# Supplementary material for: High Temperature Drives Topoisomerase Mediated Chromosomal Break Repair Pathway Choice
Source: MDPI journal article supplement (doi:10.3390/cancers13102315), 2021-05-12
Supplement: s1 [file s1]

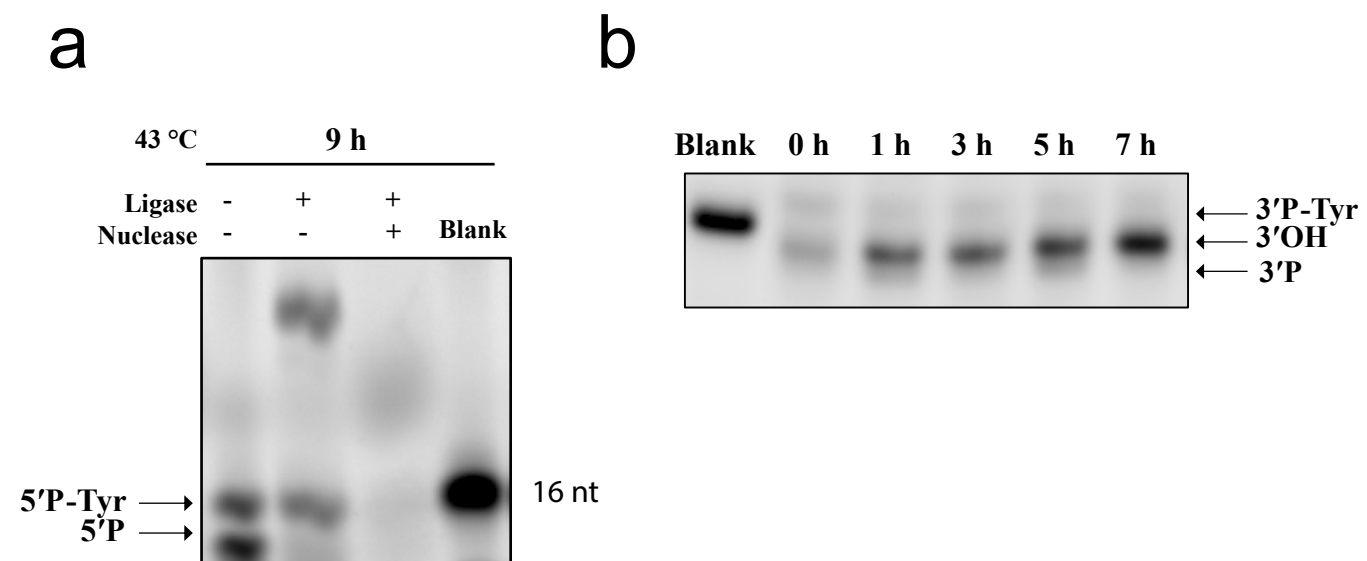

**Supplementary Fig 3: The effect of hyperthermia on TDP1 and TDP2 activity.** a) Treatment of whole cell lysates from RKO cells with nuclease cocktail reversed the protective effect of 9h heating at 43°C on TDP2-substrate, TDP2-product, and the ligatable product. b) RKO cells were incubated at 43°C for the indicated time and cell lysates incubated with TDP1 substrate for 0.5h to monitor TDP1 catalytic activity in a buffer containing Mg<sup>2+</sup>. Reaction products were separated by 20% denaturing PAGE.
