# Supplementary material for: High Temperature Drives Topoisomerase Mediated Chromosomal Break Repair Pathway Choice
Source: MDPI journal article supplement (doi:10.3390/cancers13102315), 2021-05-12
Supplement: s1 [file s1]

Fig1A: TDP1 invitro assay

Blank, 0h, 1h, 3h, 5h, 7h, 9h

Blank, 0h, 1h, 3h, 5h, 7h, 9h

Blank, 0h, 1h, 3h, 5h, 7h, 9h

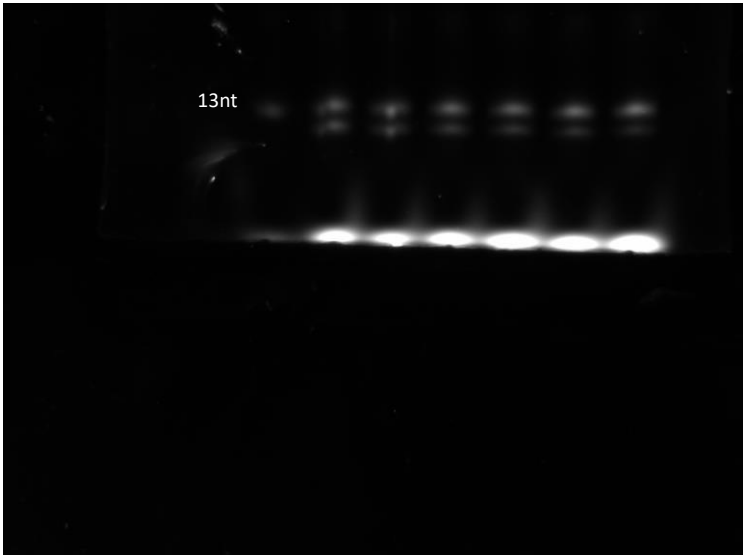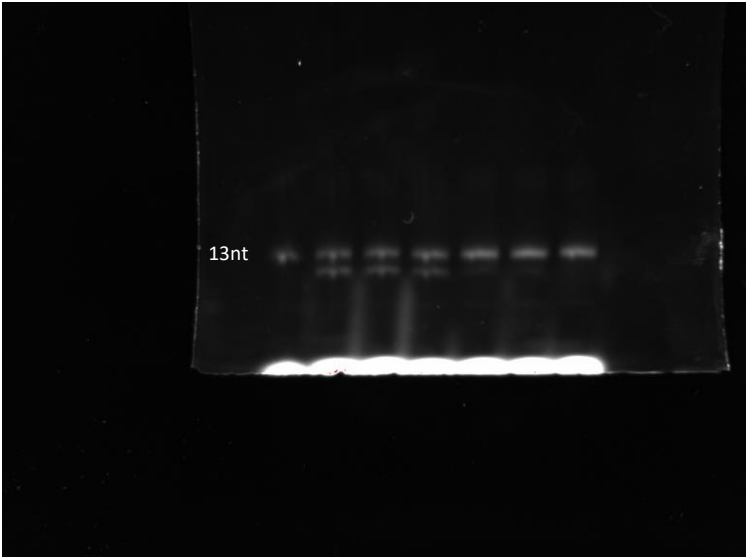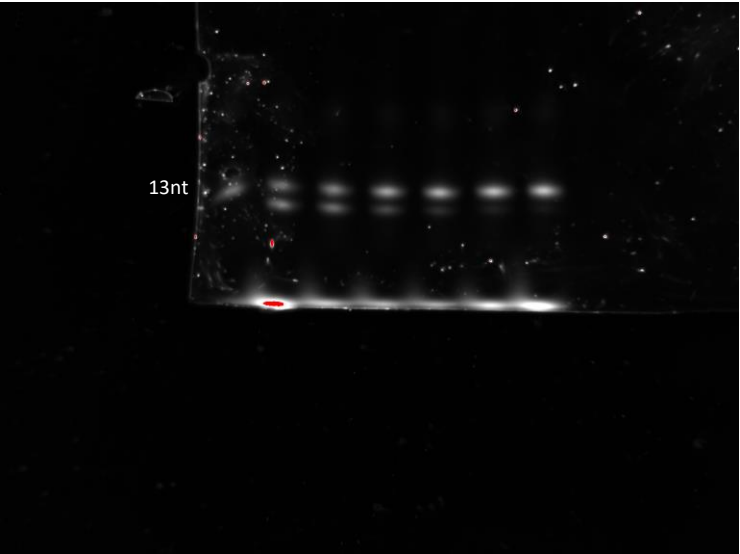

| % cleavage | 0h       | 1h       | 3h       | 5h       | 7h       | 9h       |
|------------|----------|----------|----------|----------|----------|----------|
| Repeat1    | 44.1074  | 40.25582 | 35.72831 | 20.84586 | 24.4857  | 8.377683 |
| Repeat2    | 50.86411 | 41.85025 | 26.33043 | 21.4663  | 18.47522 | 15.13043 |
| Repeat3    | 45.46976 | 36.36732 | 31.3317  | 29.97317 | 24.6808  | 19.03491 |

Fig1B: TDP1 Western

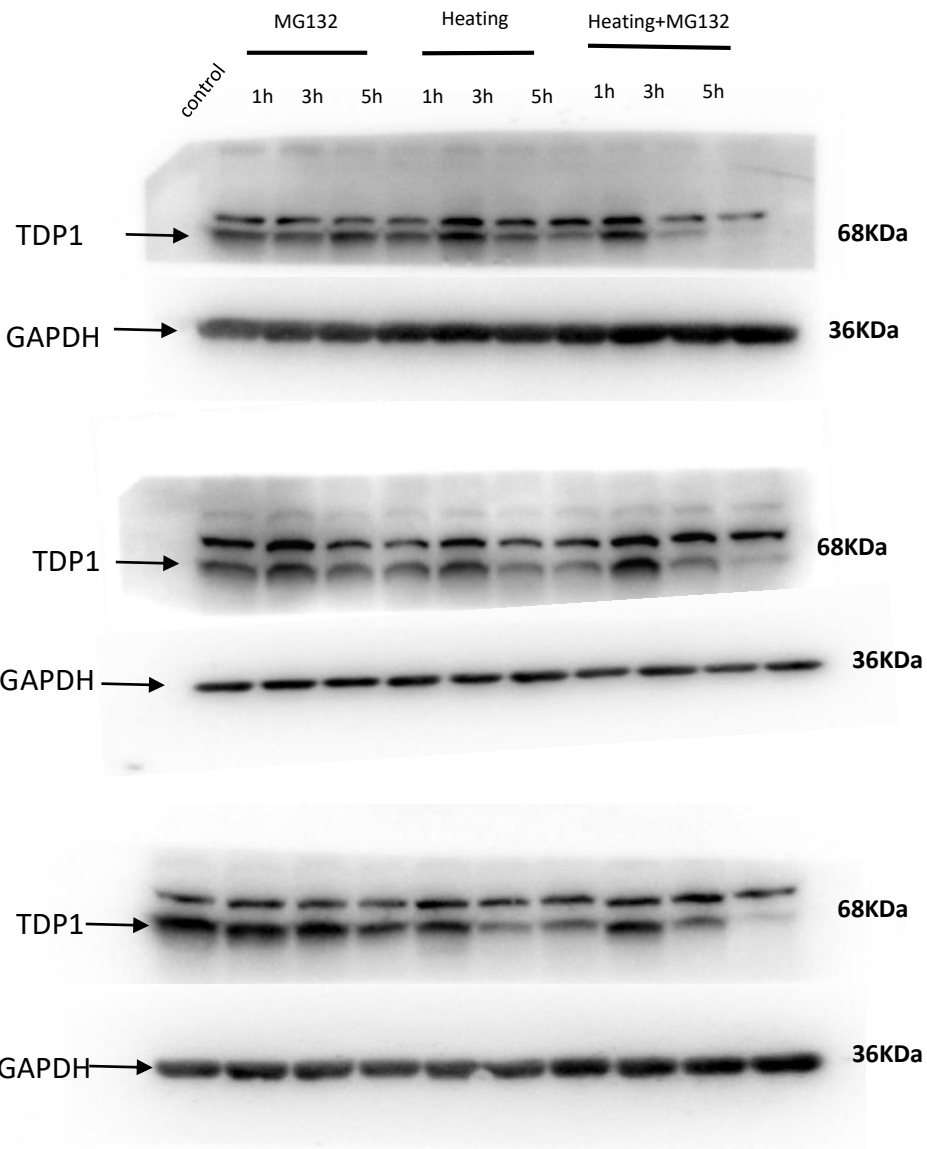

| %Normalized volume intensity |             |          |          |
|------------------------------|-------------|----------|----------|
|                              | Repeat1     | Repeat2  | Repeat3  |
| control                      | 100         | 100      | 100      |
| MG132 1h                     | 74.83055121 | 100.7597 | 80.101   |
| MG132 3h                     | 85.58599175 | 80.70128 | 89.05894 |
| MG132 5h                     | 63.57478614 | 70.82019 | 71.99743 |
| heating 1h                   | 73.83334011 | 88.92883 | 81.48503 |
| heating 3h                   | 51.42533887 | 39.20809 | 53.65322 |
| heating 5h                   | 51.82419206 | 52.79384 | 51.46706 |
| MG132 + heating 1h           | 89.18765113 | 95.56353 | 70.39322 |
| MG132 + heating 3h           | 30.75925353 | 69.93904 | 41.86297 |
| MG132 + heating 5h           | 0           | 38.15382 | 14.06006 |

Fig1C: TDP1 invitro assay

MG132

Heating

MG132+Heating

0h 1h 3h 5h 7h 9h blank

0h 1h 3h 5h 7h 9h blank

0h 1h 3h 5h 7h 9h blank

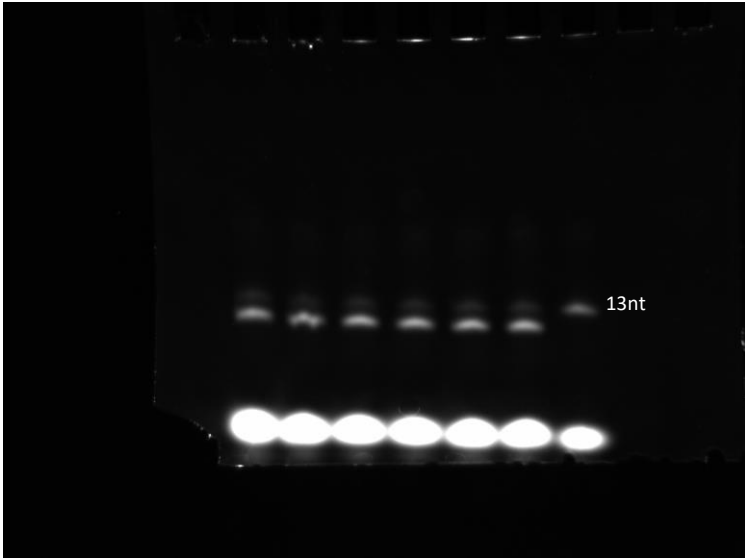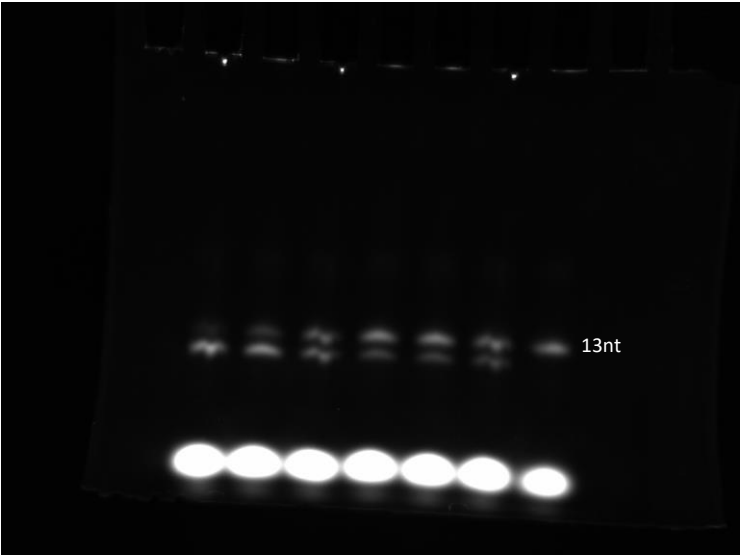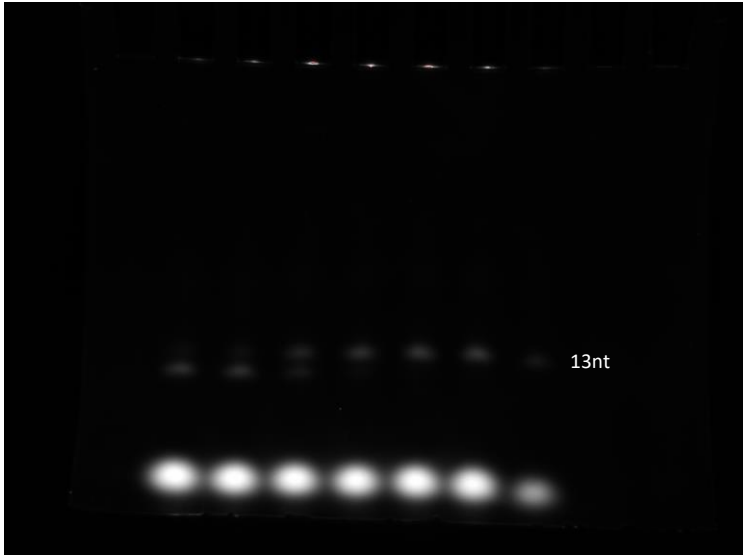

Repeat1

Fig1C: TDP1 invitro assay continue

MG132

Heating

MG132+Heating

0h 1h 3h 5h 7h 9h blank

0h 1h 3h 5h 7h 9h blank

0h 1h 3h 5h 7h 9h blank

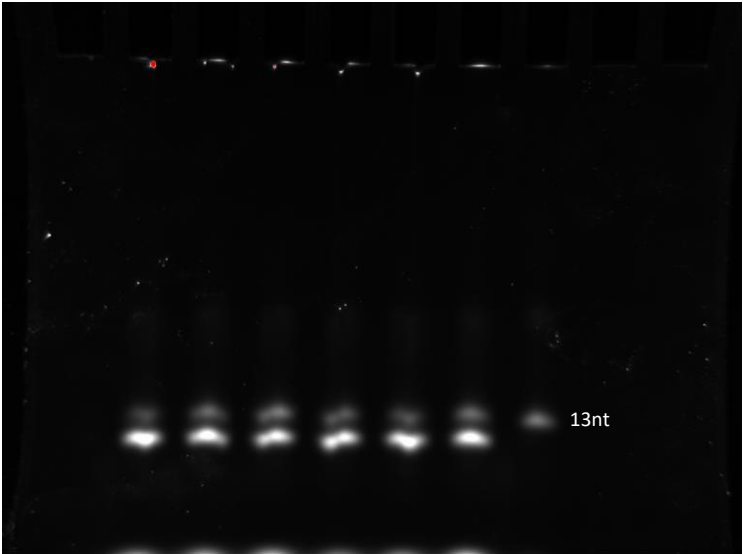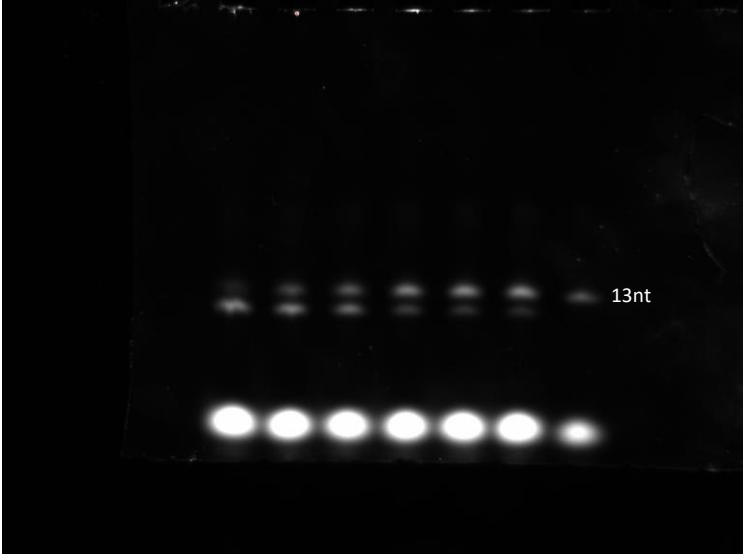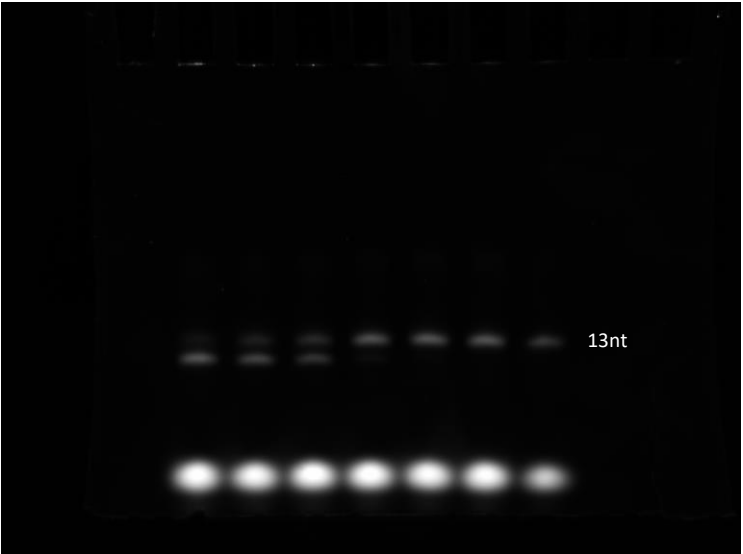

Repeat2

Fig1C: TDP1 invitro assay continue

MG132

Heating

MG132+Heating

0h 1h 3h 5h 7h 9h blank

0h 1h 3h 5h 7h 9h blank

0h 1h 3h 5h 7h 9h blank

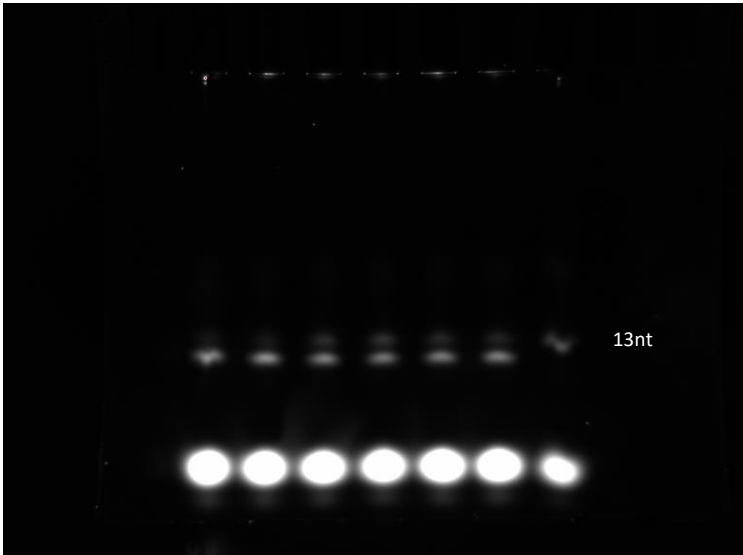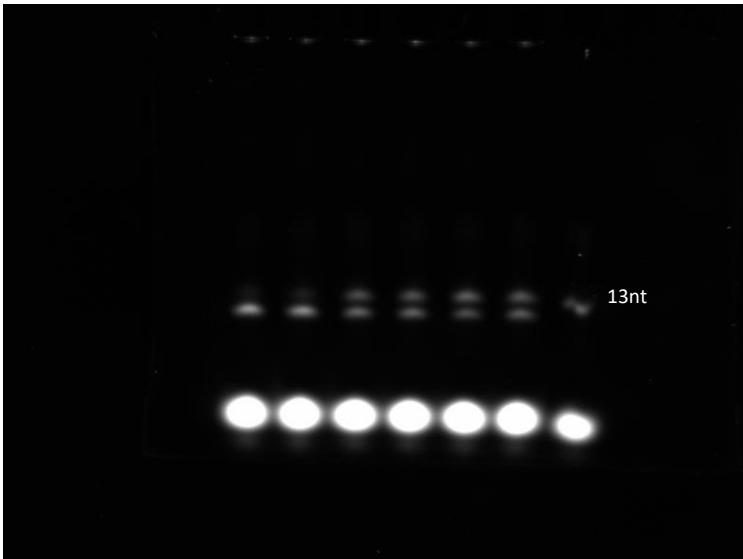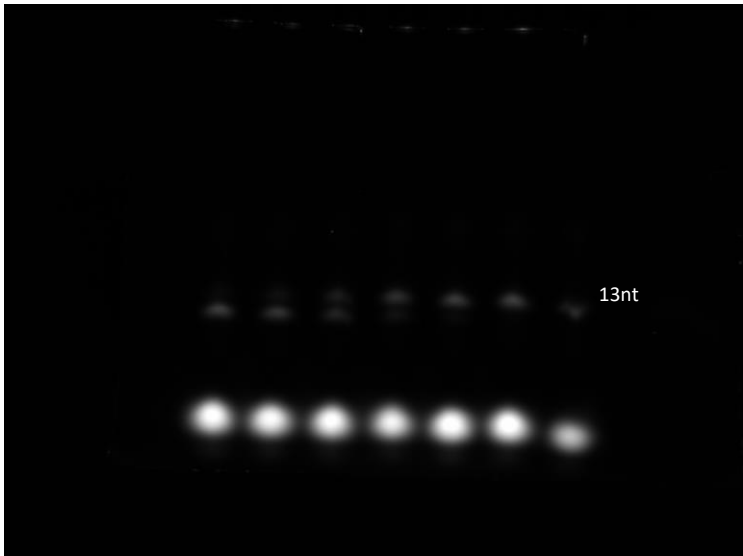

Repeat3

Fig1C: TDP1 invitro assay continue

MG132

Heating

MG132+Heating

0h 1h 3h 5h 7h 9h blank

0h 1h 3h 5h 7h 9h blank

0h 1h 3h 5h 7h 9h blank

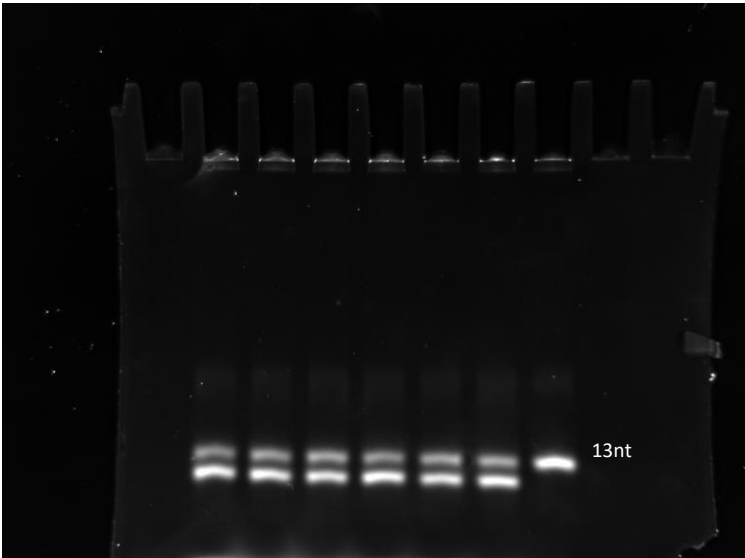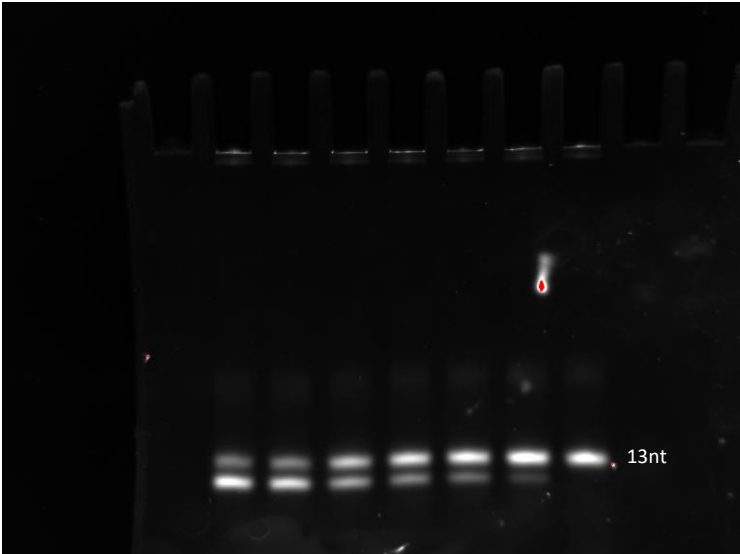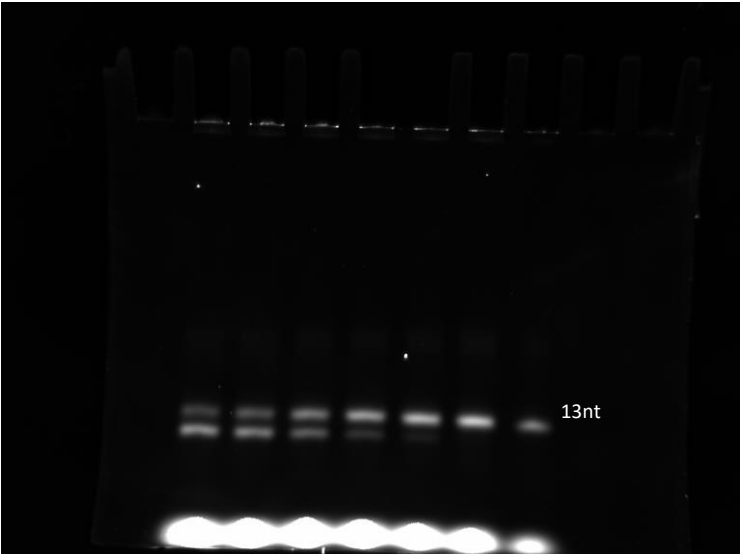

Repeat4



Fig1D: TDP1 invitro assay

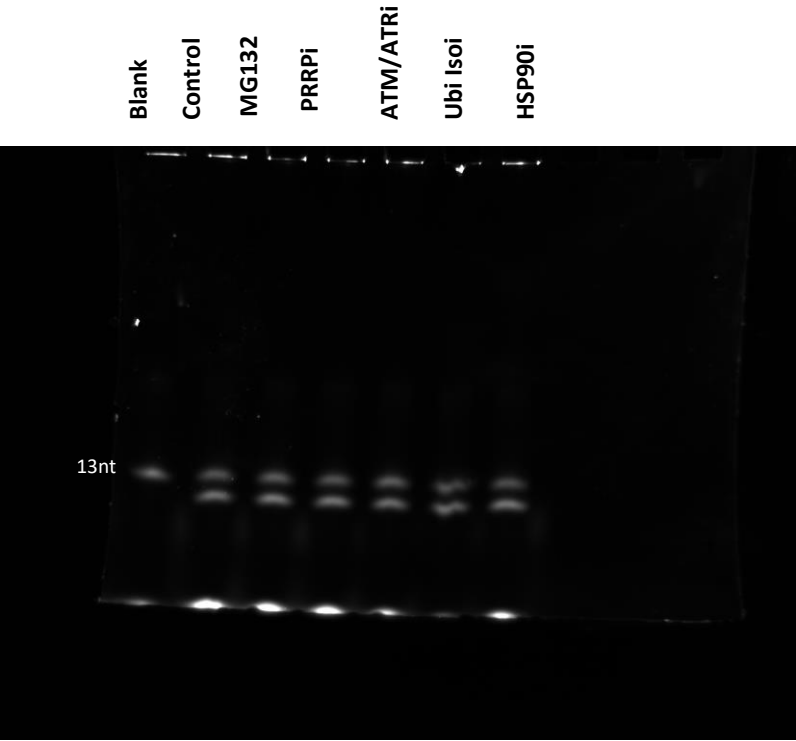

Repet1

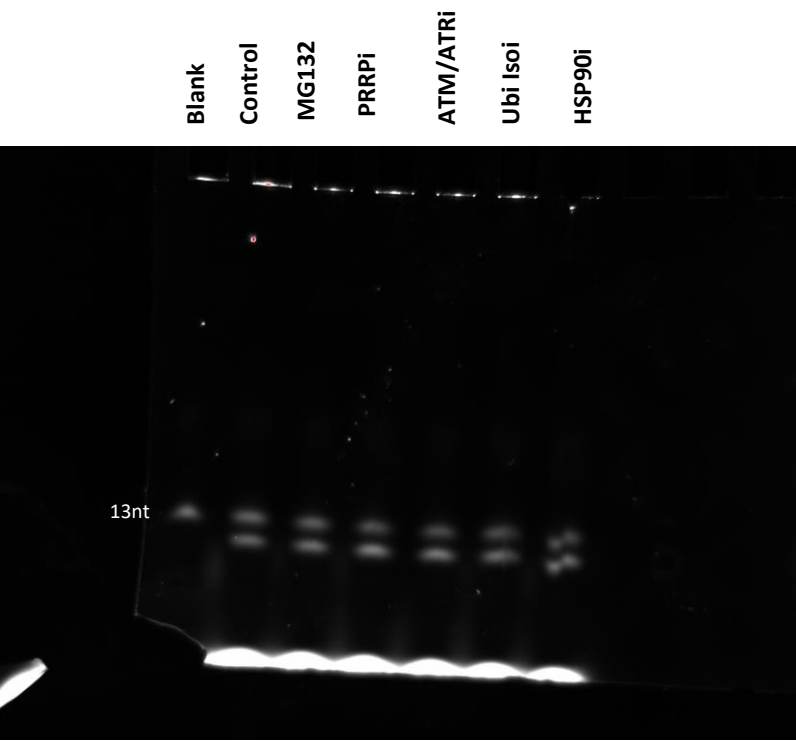

Repeat2

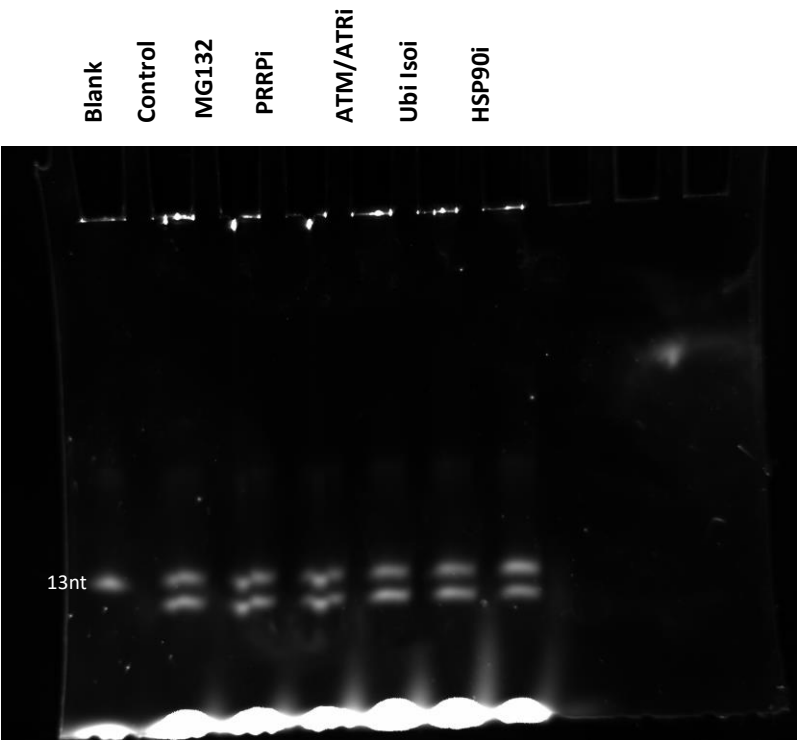

Repeat3



Fig1D: TDP1 invitro assay, continue

Heating

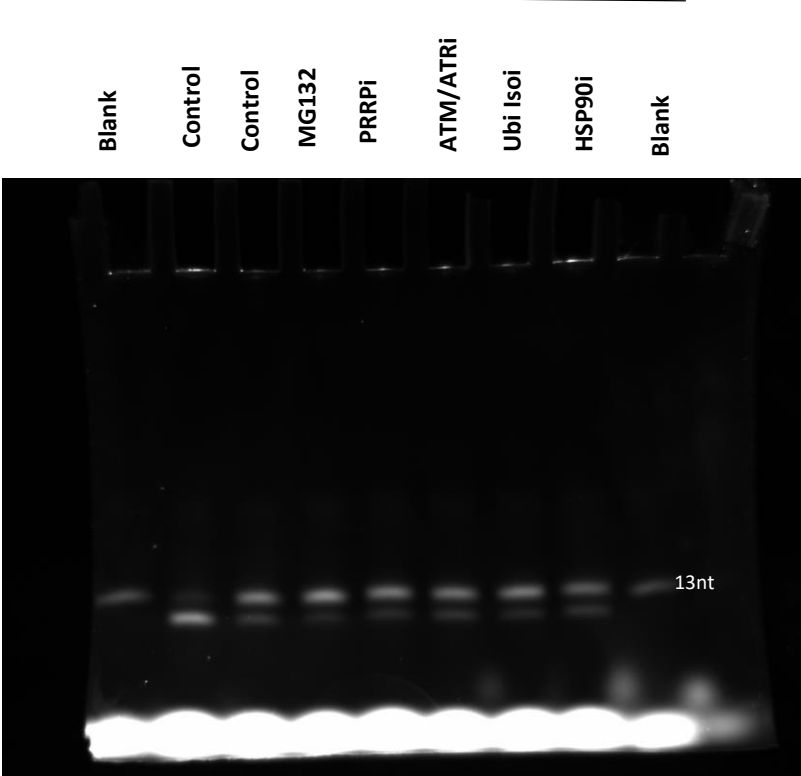

Repet1

Heating

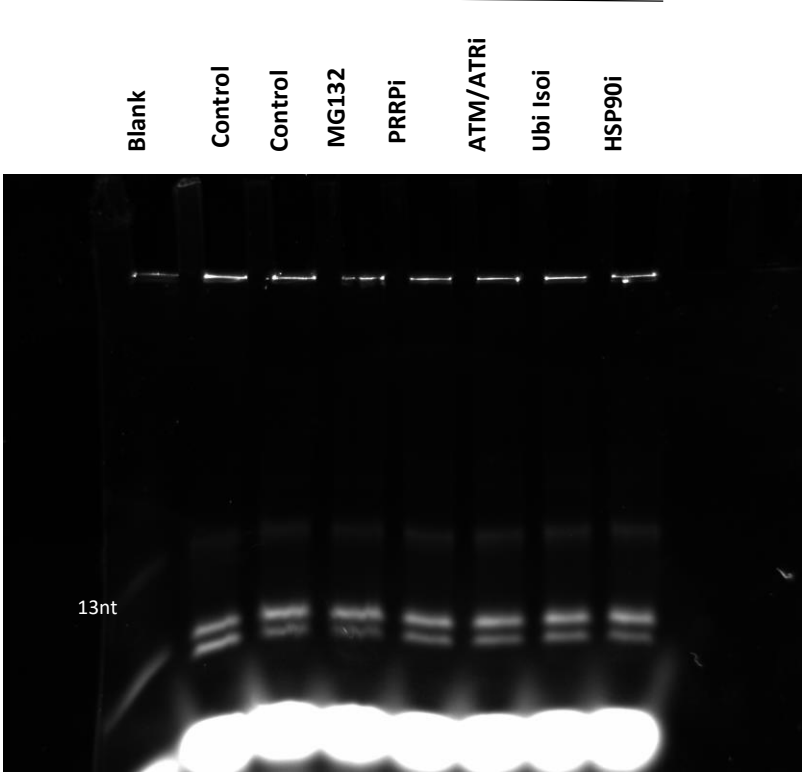

Repeat2

Heating

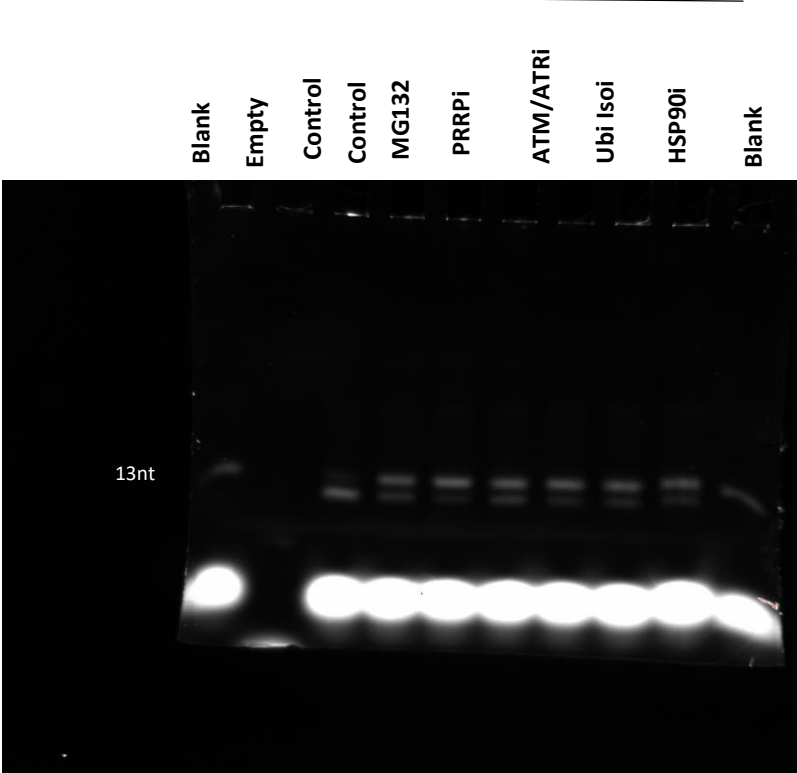

Repeat3

Fig1D: TDP1 invitro assay, continue

| %cleavage | 37 C     |             |          |          |          |          |  | 43 C     |             |          |          |          |          |
|-----------|----------|-------------|----------|----------|----------|----------|--|----------|-------------|----------|----------|----------|----------|
|           | Control  | Proteasomei | PARP1i   | ATM/ATRi | Ubi Isoi | HSP90i   |  | Control  | Proteasomei | PARP1i   | ATM/ATRi | Ubi Isoi | HSP90i   |
| Repeat1   | 57.20786 | 56.74524    | 59.02905 | 53.23292 | 57.12169 | 60.07663 |  | 27.86069 | 15.32786    | 21.54316 | 26.40525 | 20.06583 | 28.18786 |
| Repeat2   | 49.4245  | 54.96778    | 65.0804  | 63.60718 | 59.90654 | 64.00634 |  | 32.19458 | 13.18458    | 31.44682 | 21.19371 | 25.98292 | 24.54855 |
| Repeat3   | 54.39316 | 53.32893    | 51.75794 | 57.29839 | 55.16569 | 42.53342 |  | 22.87472 | 9.455078    | 22.29456 | 28.30271 | 18.0063  | 18.17538 |

Fig2A: TDP2 invitro assay

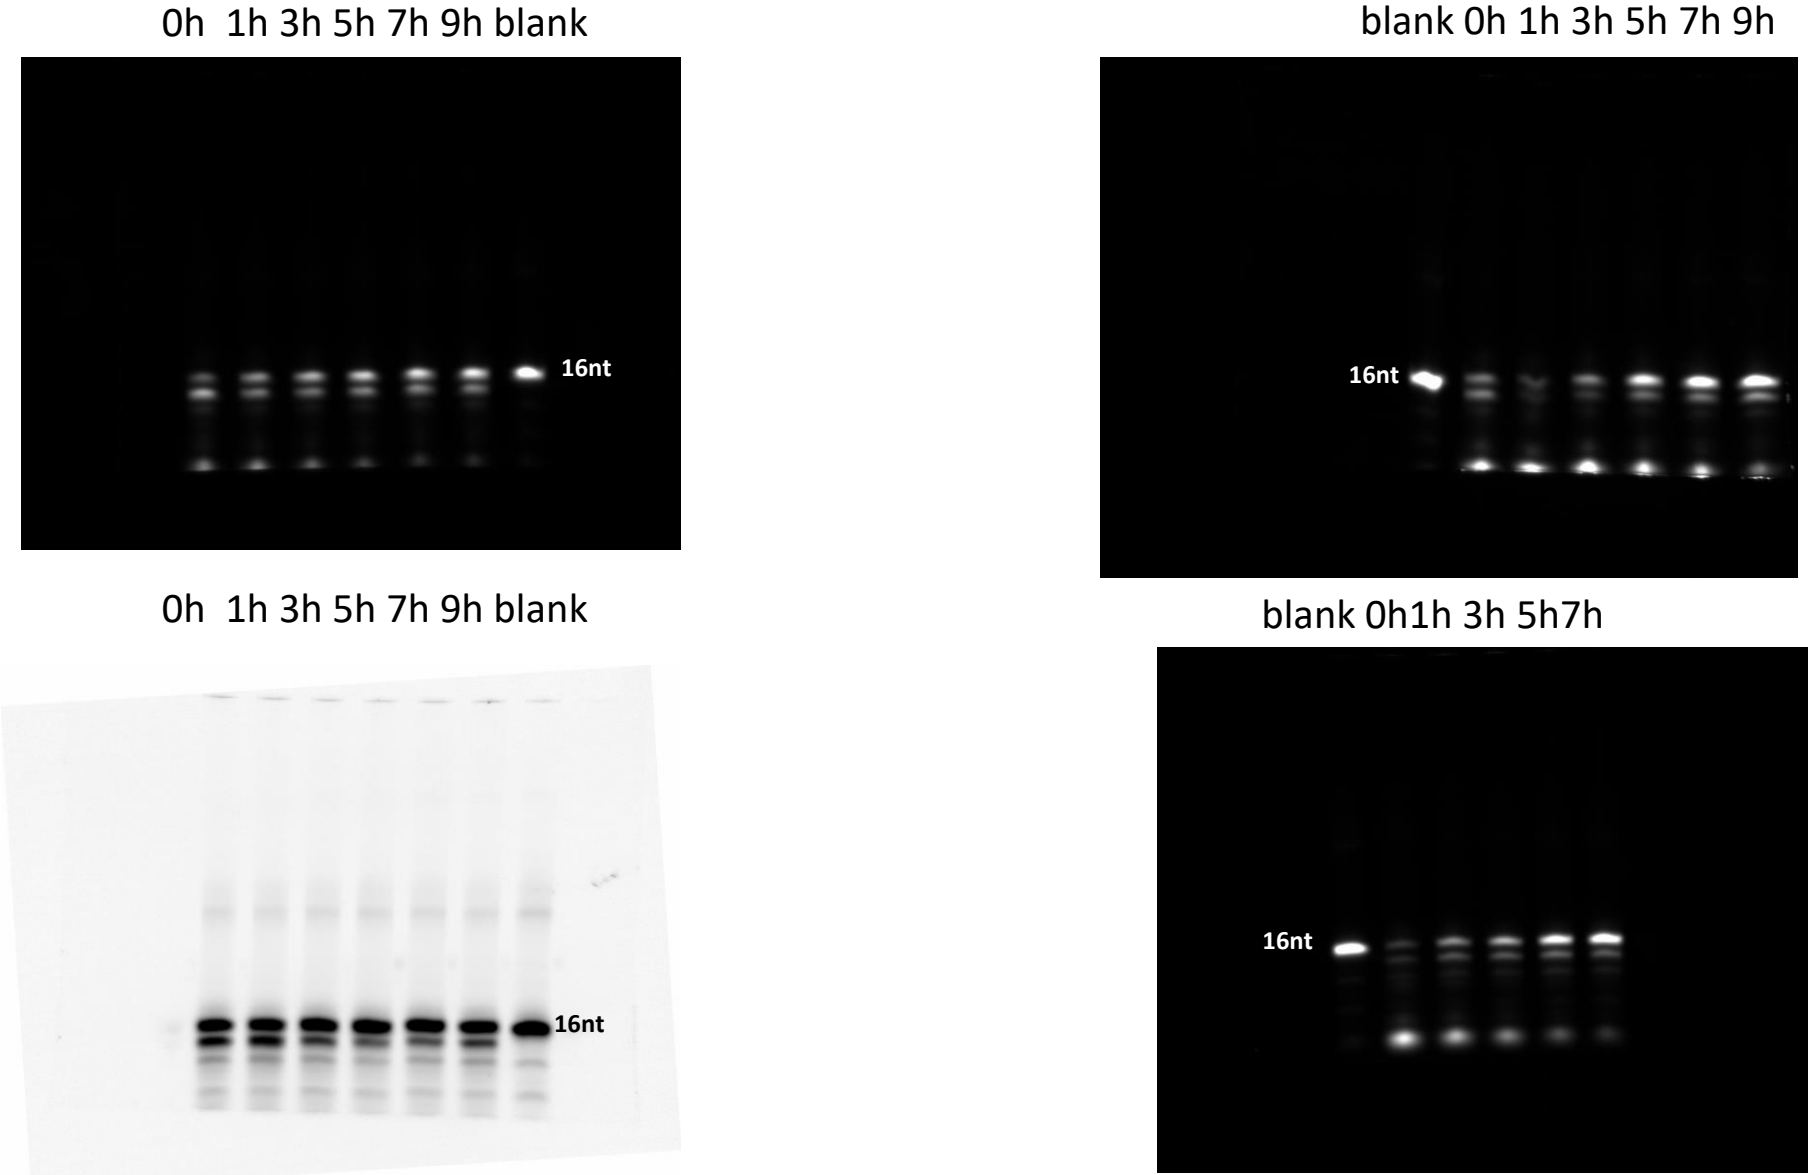

| %Cleavage | 0h | 1h   | 3h       | 5h      | 7h       | 9h       |
|-----------|----|------|----------|---------|----------|----------|
| Repeat1   | 57 | 42   | 34.46452 | 33.3543 | 32.72638 | 28.22608 |
| Repeat2   | 52 | 40.5 | 22.74542 | 20      | 18.02505 | 20.71826 |
| Repeat3   | 41 | 43   | 19       | 11.5    | 11       | 13       |
| Repeat4   | 50 | 41   | 40       | 33      | 25       |          |

Fig2B: TDP2 Western

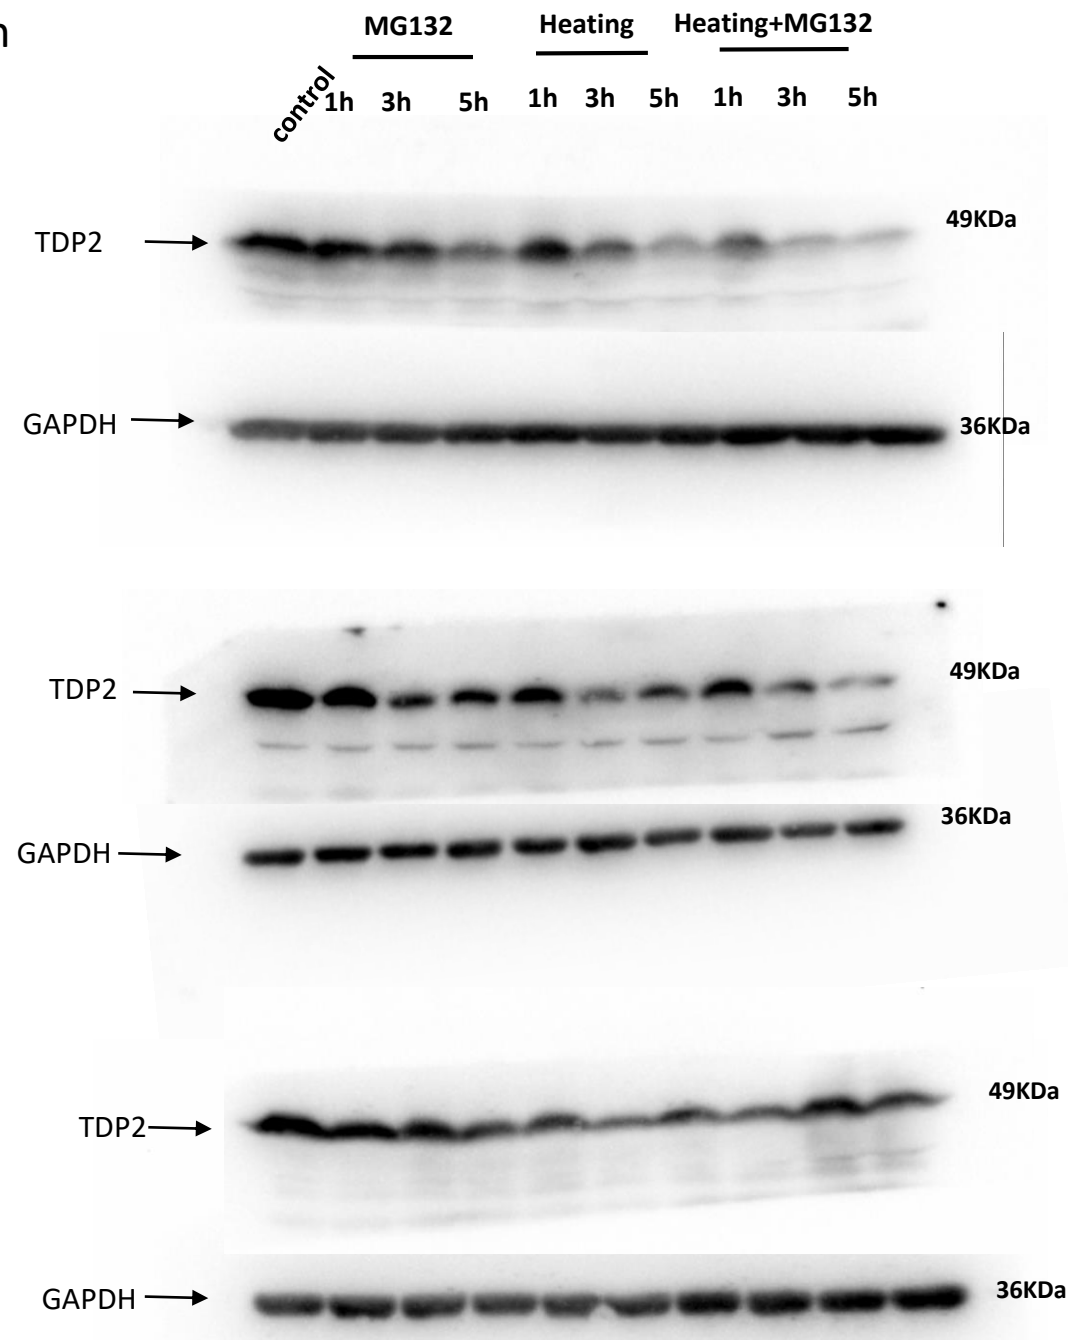

| %Normalized volume intensity |          |          |          |
|------------------------------|----------|----------|----------|
|                              | Repeat1  | Repeat2  | Repeat3  |
| control                      | 100      | 100      | 100      |
| MG132 1h                     | 88.85992 | 53.86642 | 66.70549 |
| MG132 3h                     | 61.70755 | 21.00316 | 73.00844 |
| MG132 5h                     | 39.96519 | 24.76178 | 56.43512 |
| heating 1h                   | 61.96806 | 33.88544 | 56.71766 |
| heating 3h                   | 43.70052 | 11.37746 | 41.10401 |
| heating 5h                   | 21.18826 | 20.77166 | 43.0932  |
| MG132 + heating 1h           | 38.01299 | 27.62734 | 34.58984 |
| MG132 + heating 3h           | 16.71789 | 15.09612 | 54.34561 |
| MG132 + heating 5h           | 17.13387 | 7.130026 | 34.87407 |

Fig2C: TDP2 invitro assay

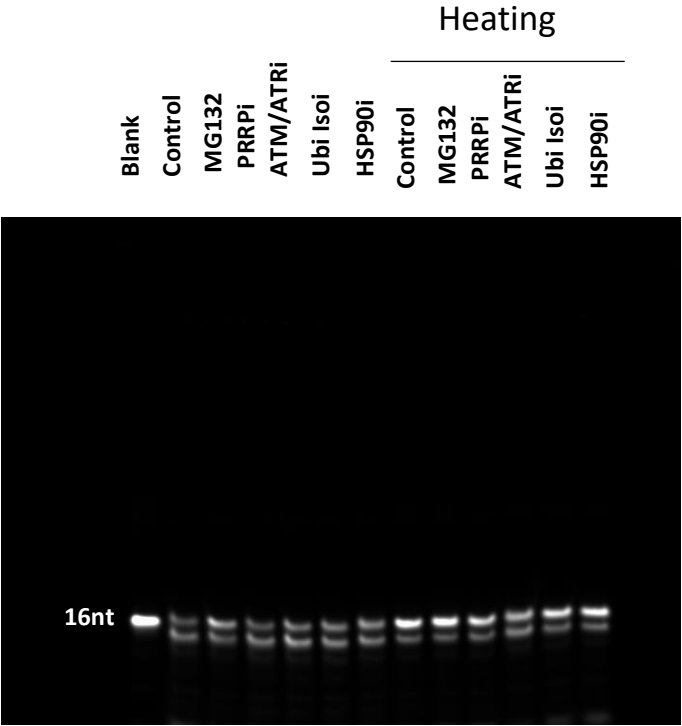

Repeat1

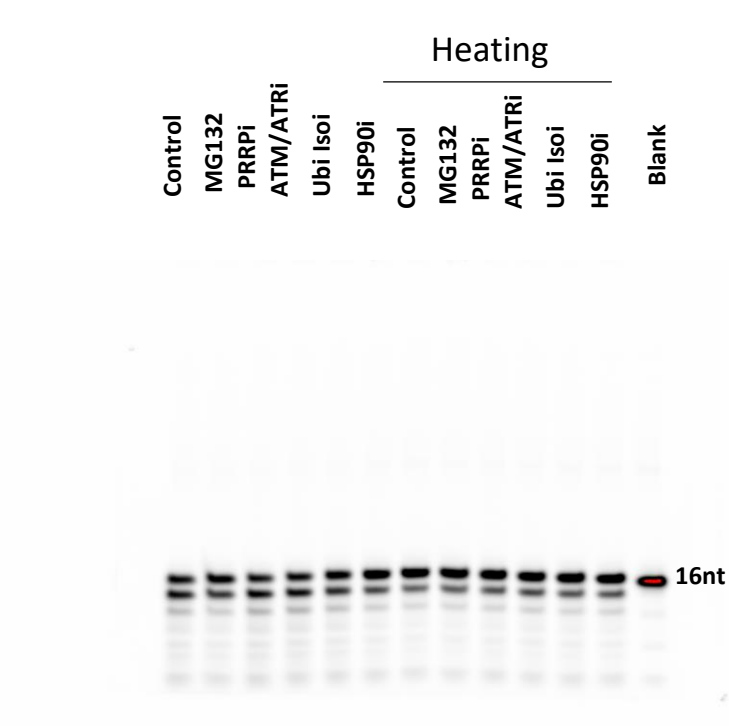

Repeat2

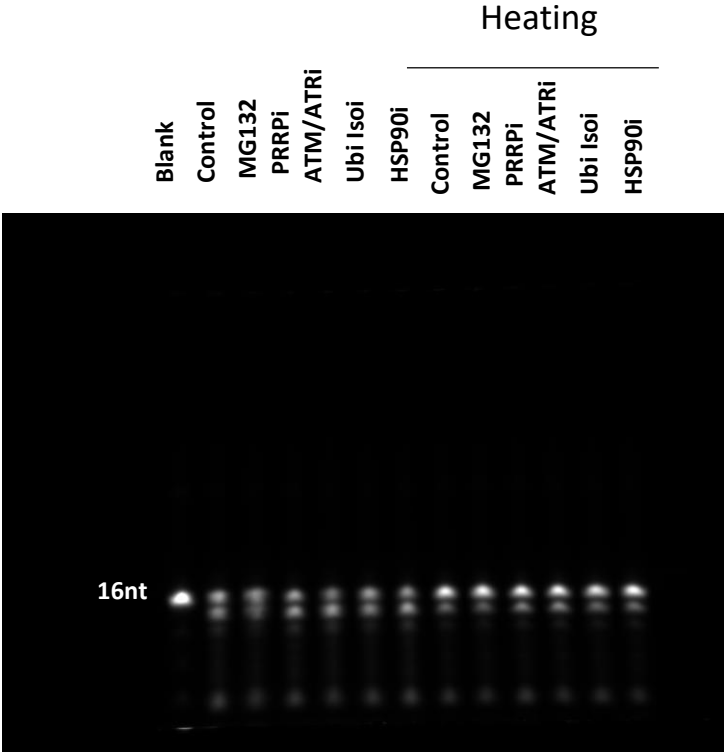

Repeat3

Fig2C: TDP2 invitro assay, continue

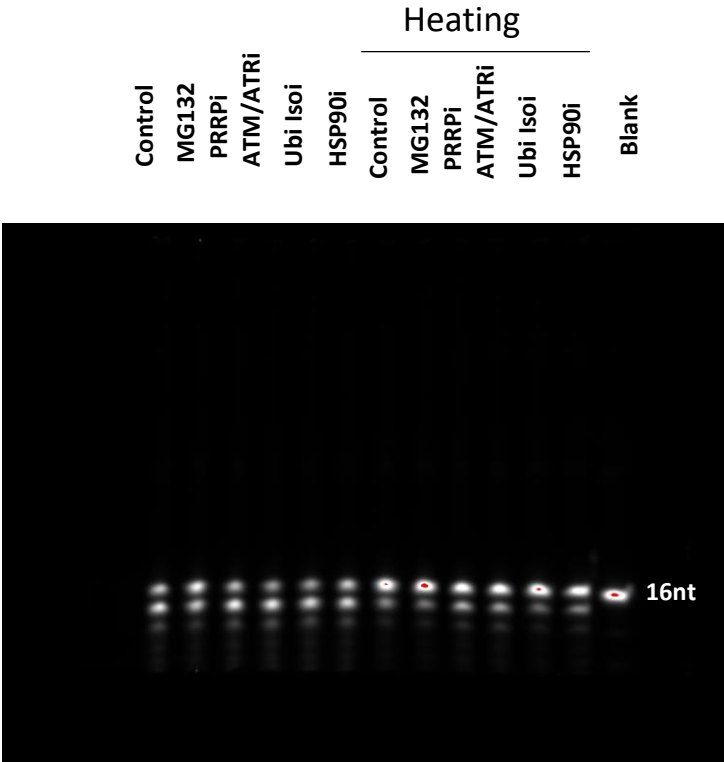

Repeat4

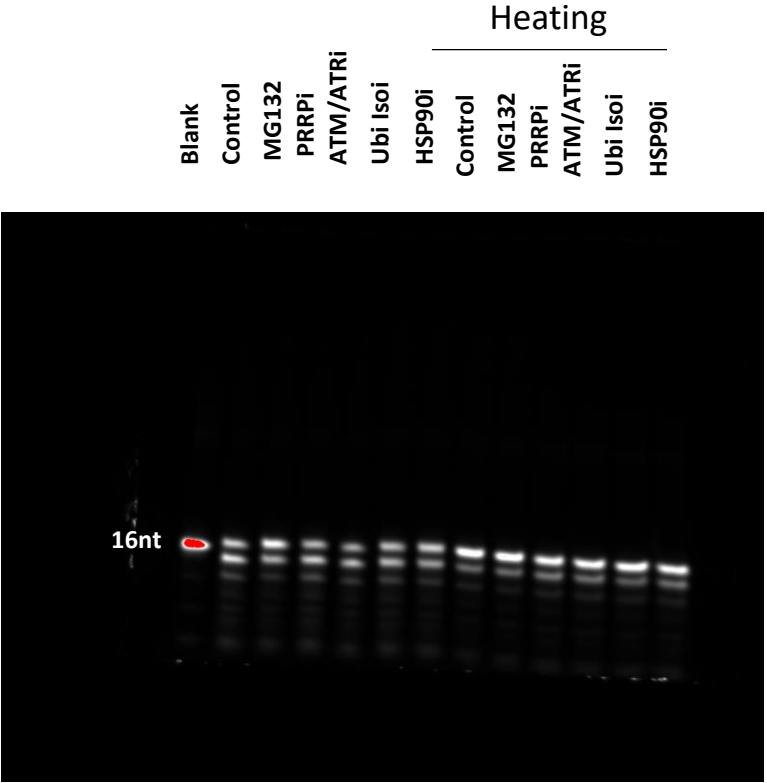

Repeat5

Fig2C: TDP2 invitro assay, continue

| %Cleaveage | 37       |             |          |          |          |          |  | 43       |             |          |          |          |          |
|------------|----------|-------------|----------|----------|----------|----------|--|----------|-------------|----------|----------|----------|----------|
|            | Control  | Proteasomei | PARP1i   | Atm/Atri | Ubi Isoi | HSP90i   |  | Control  | Proteasomei | PARP1i   | Atm/Atri | Ubi Isoi | HSP90i   |
| Repeat1    | 57.12542 | 39.11175    | 57.55021 | 54.20614 | 49.03107 | 44.40487 |  | 26.06424 | 24.11538    | 30.41009 | 41.88216 | 31.08516 | 29.80286 |
| Repeat2    | 52.0935  | 42.14672    | 57.42222 | 61.76515 | 60.19656 | 52.10208 |  | 25.17908 | 20.08203    | 33.86115 | 30.64224 | 17.8532  | 25.84065 |
| Repeat3    | 52.92242 | 38.52909    | 53.8455  | 52.93266 | 49.32194 | 41.39175 |  | 23.0625  | 23.17492    | 29.04115 | 27.68463 | 22.50063 | 28.72457 |
| Repeat4    | 46.06944 | 37.97119    | 49.4824  | 47.07979 | 38.62291 | 27.77775 |  | 23.75547 | 25.92907    | 26.14825 | 27.98453 | 25.54146 | 24.99295 |
| Repeat5    | 42.2169  | 37.19907    | 48.71686 | 58.1911  | 43.68882 | 52.7925  |  | 24.73015 | 21.7516     | 29.18949 | 31.85882 | 26.63635 | 24.55925 |

Fig4 C: TDP2 invitro assay

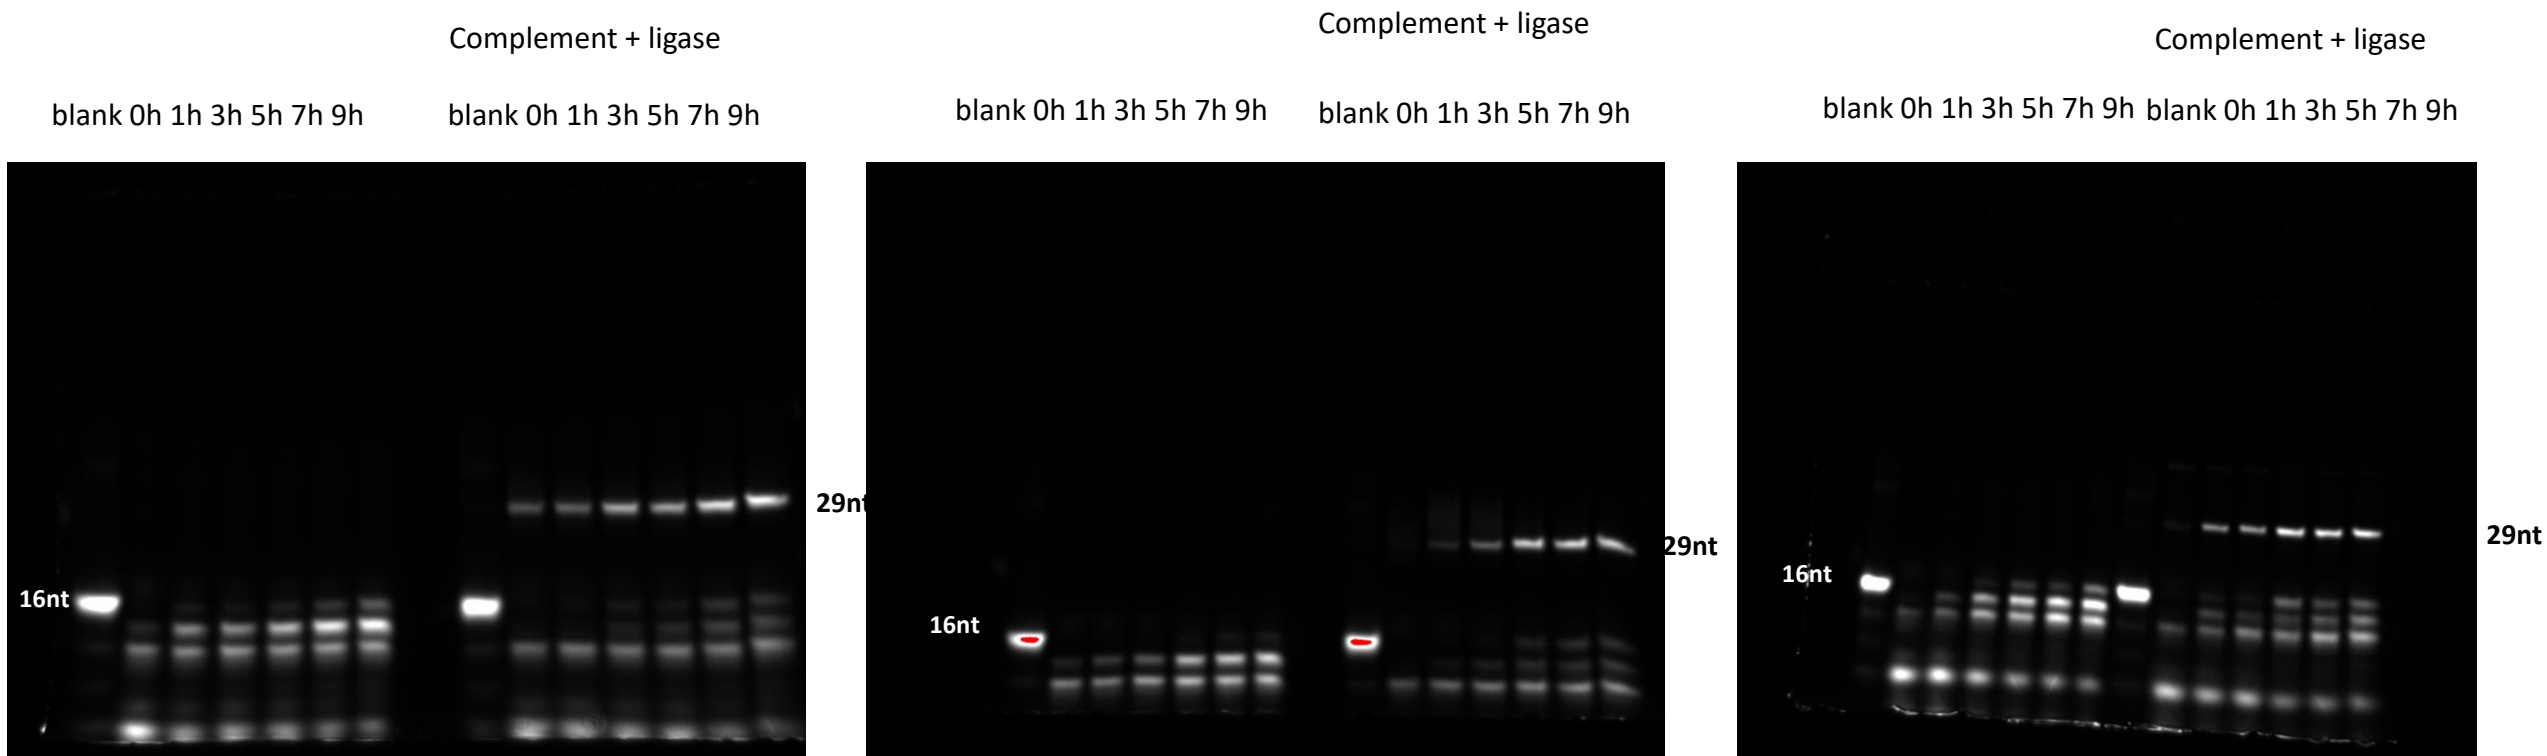

| 29nt substrate level | oh | 1h       | 3h       | 5h       | 7h       | 9h       |
|----------------------|----|----------|----------|----------|----------|----------|
| Repeat1              | 1  | 7.279684 | 8.477099 | 15.31179 | 14.09294 | 14.57037 |
| Repeat2              | 1  | 5.22     | 7.753028 | 17.4405  | 17.83362 | 17.97073 |
| Repeat3              | 1  | 4.235    | 6.351    | 12.112   | 12.5     | 13.388   |



Fig5 A: TDP1 invitro assay

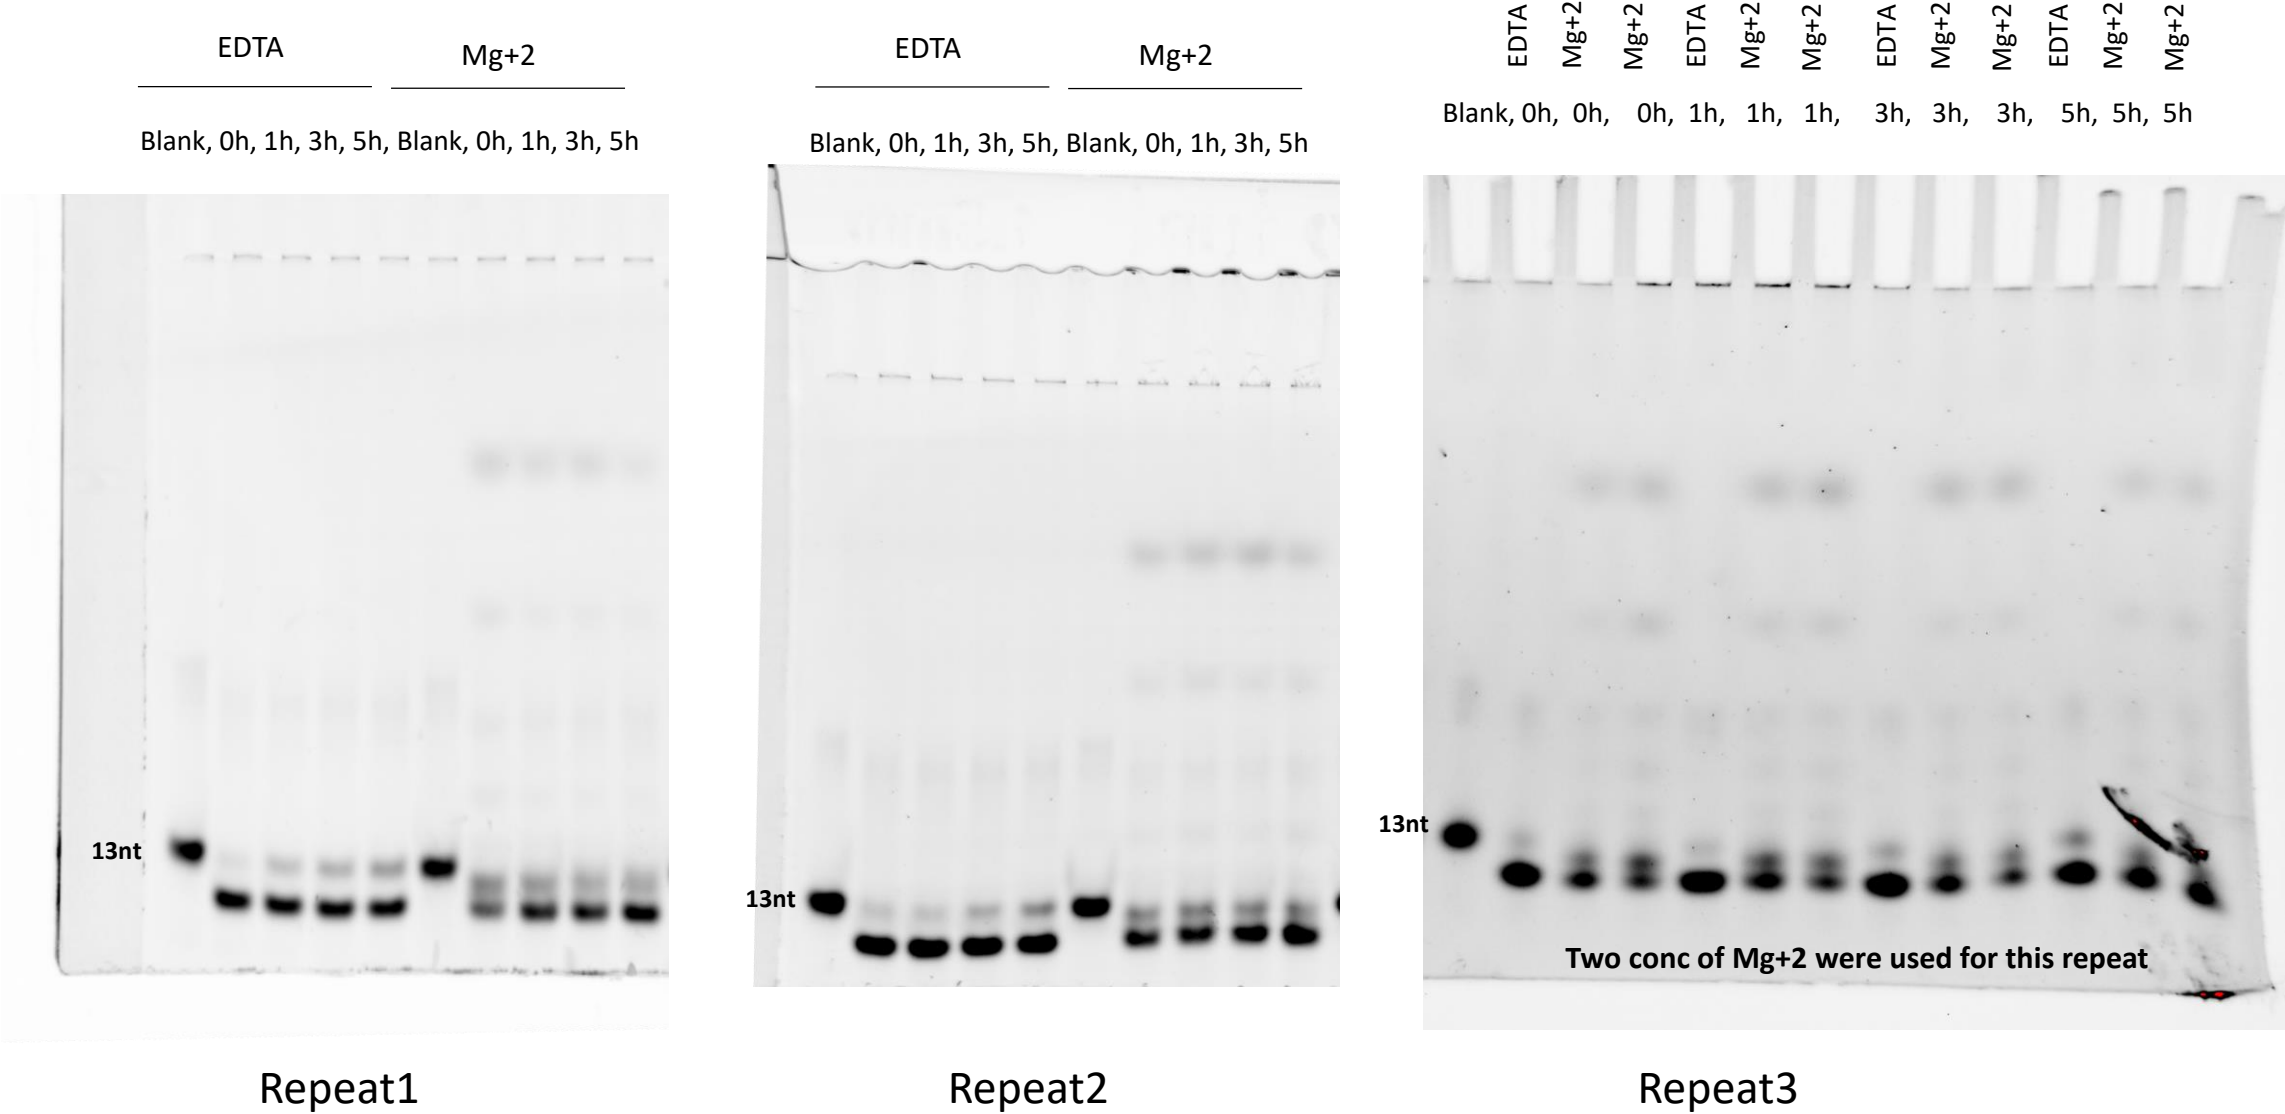

Fig5 A: TDP1 invitro assay, continue

|      |    | Repeat1  | Repeat2  | Repeat3  |
|------|----|----------|----------|----------|
| EDTA | 0h | 100      | 100      | 100      |
|      | 1h | 95.03922 | 97.66573 | 100.201  |
|      | 3h | 94.70588 | 97.01214 | 107.7387 |
|      | 5h | 95.98039 | 93.81046 | 109.5477 |
|      |    |          |          |          |
| Mg+2 | 0h | 30.39216 | 28.38469 | 21.00503 |
|      | 1h | 54.01961 | 47.43231 | 35.9799  |
|      | 3h | 59.21569 | 60.69374 | 45.91457 |
|      | 5h | 75       | 82.81979 | 79.19598 |

Fig5 C: TDP1 invitro assay

EDTA

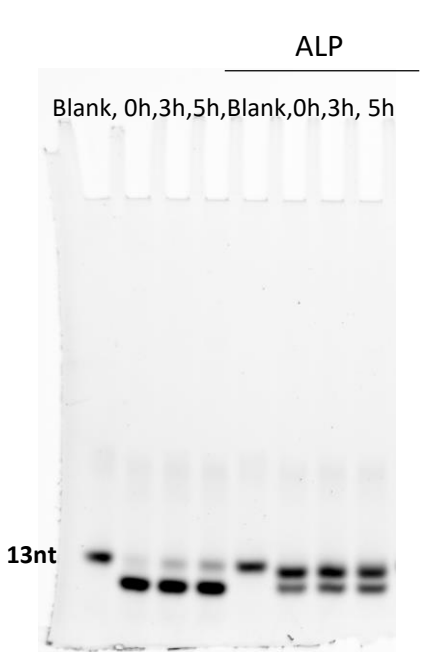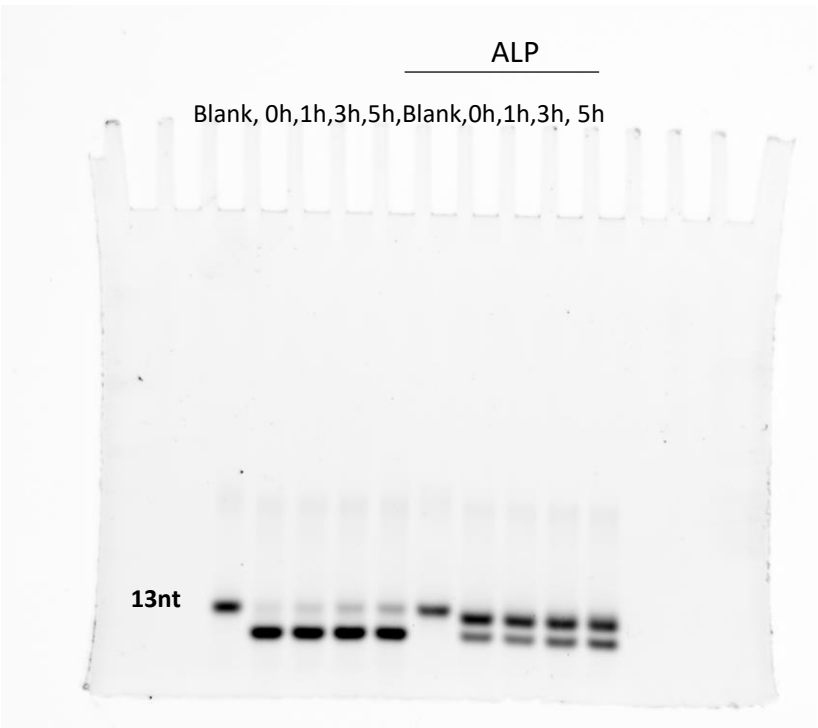

Mg+2

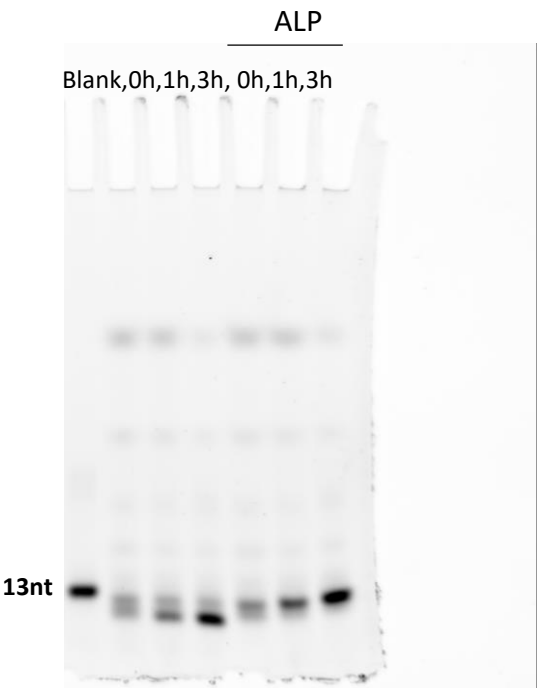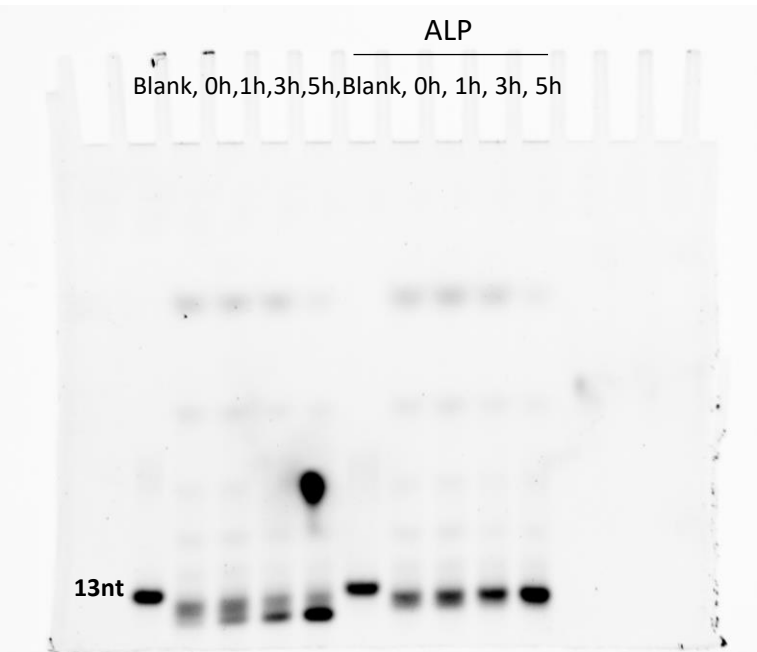

Fig5 E: TDP1 invitro

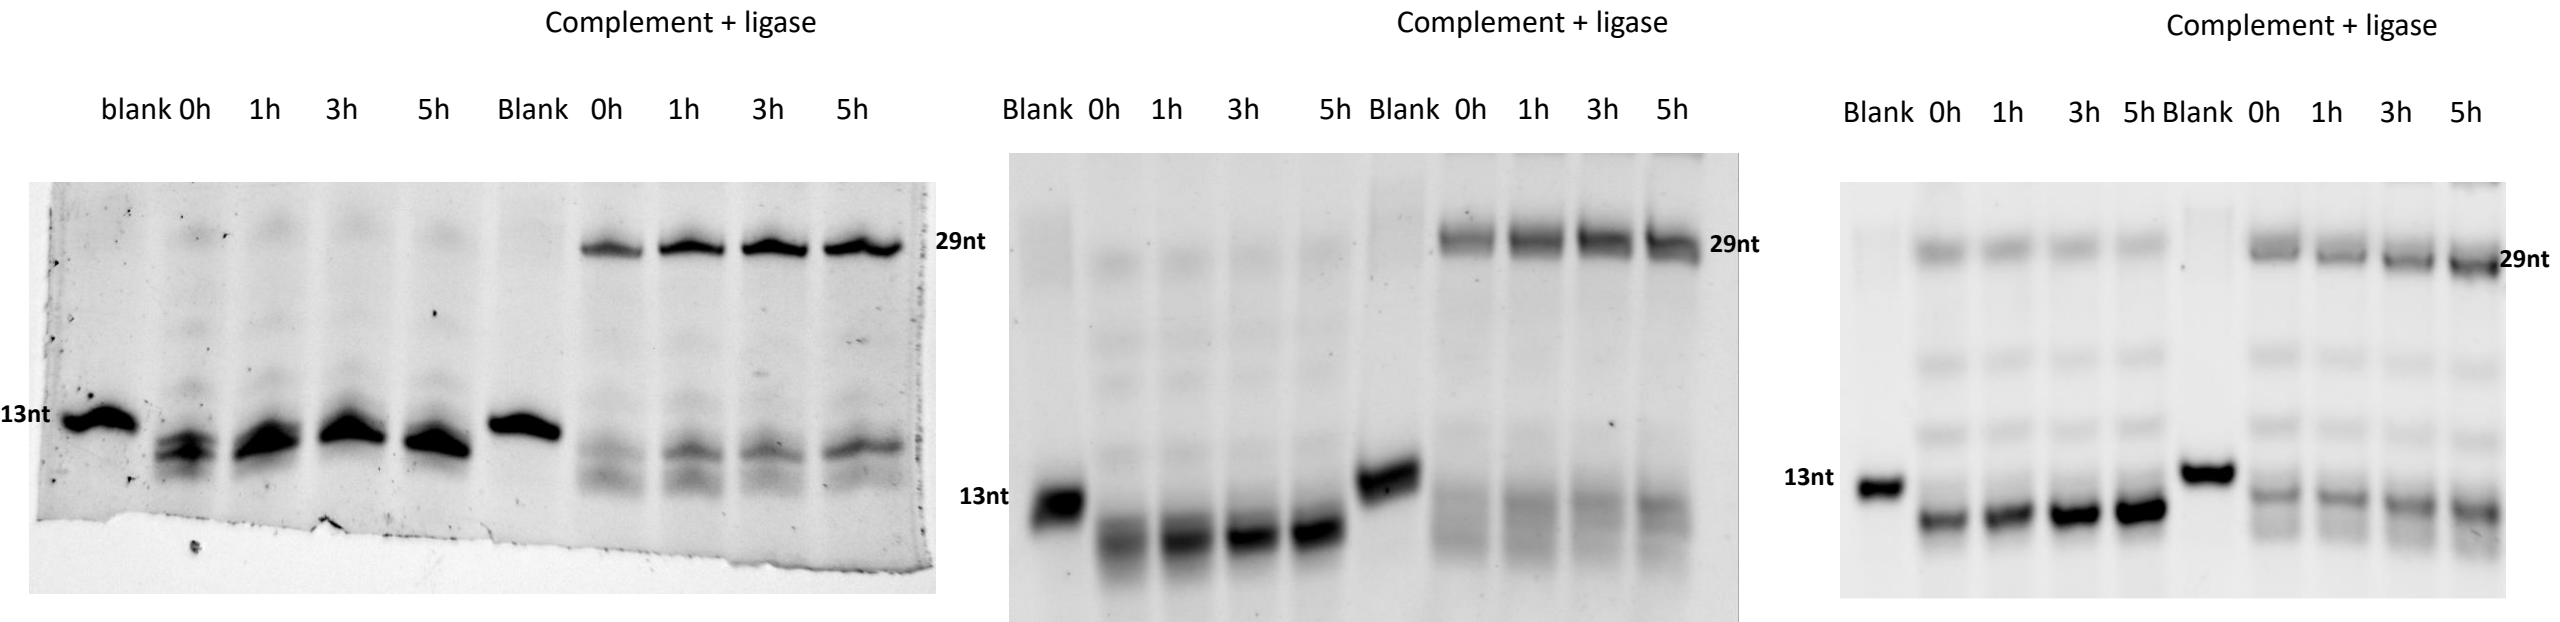

| 29nt substrate level | oh | 1h   | 3h   | 5h   |
|----------------------|----|------|------|------|
| Repeat1              | 1  | 1.62 | 1.98 | 2.06 |
| Repeat2              | 1  | 1.5  | 1.69 | 1.55 |
| Repeat3              | 1  | 1.4  | 1.63 | 1.85 |

Sup Fig1A: TDP1 invitro

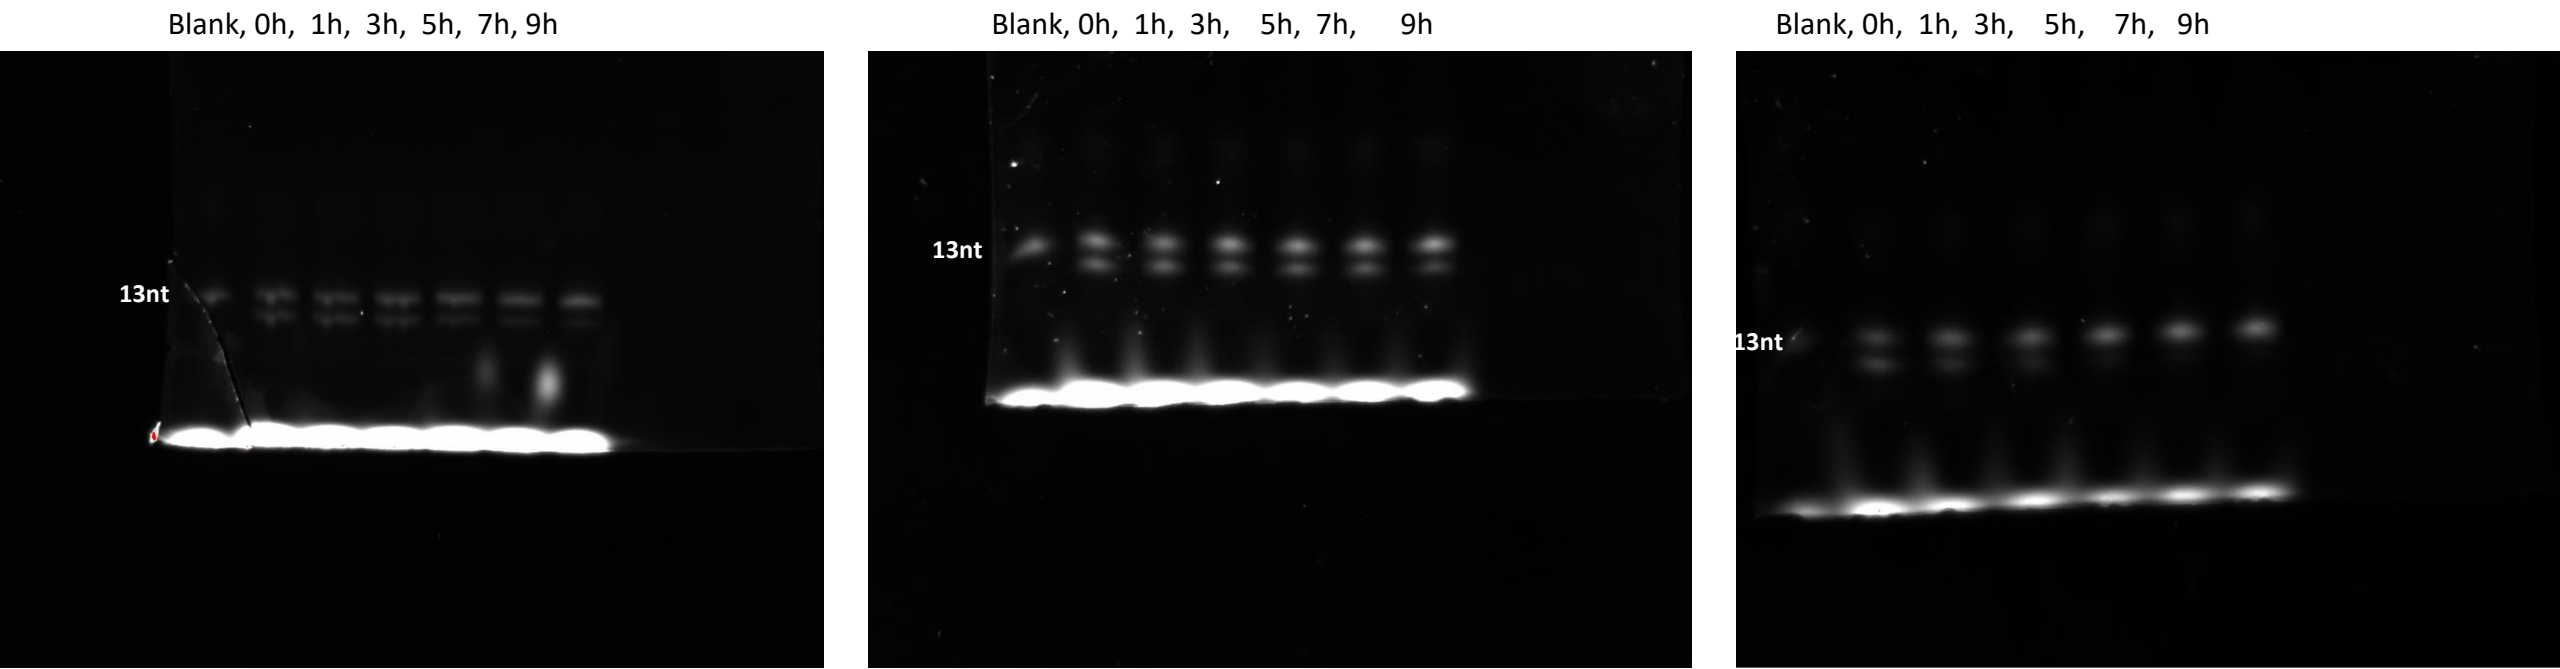

|         | 0h       | 1h       | 3h       | 5h       | 7h       | 9h       |
|---------|----------|----------|----------|----------|----------|----------|
| Repeat1 | 51.20768 | 47.13295 | 45.29554 | 37.37342 | 36.75391 | 32.17669 |
| Repeat2 | 48.86694 | 44.15135 | 36.21256 | 35.9338  | 36.33237 | 27.12692 |
| Repeat3 | 51.14233 | 38.98247 | 29.61954 | 17.99809 | 17.23016 | 3.805741 |

Sup Fig1B: TDP1 invitro

No Recovery

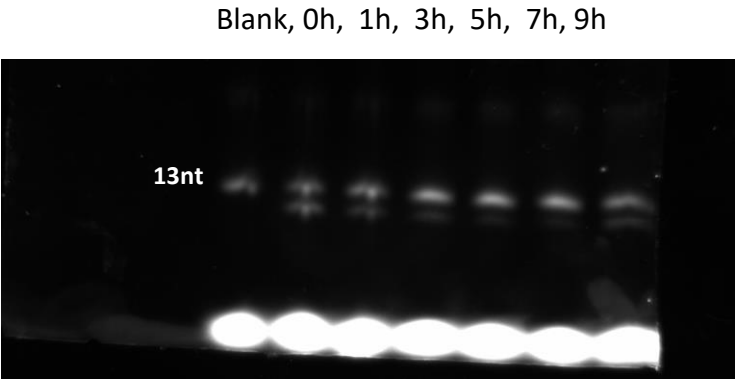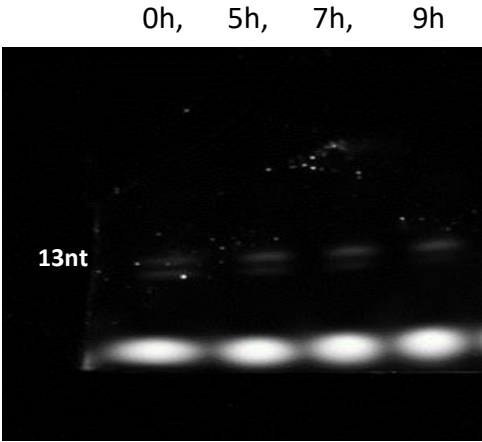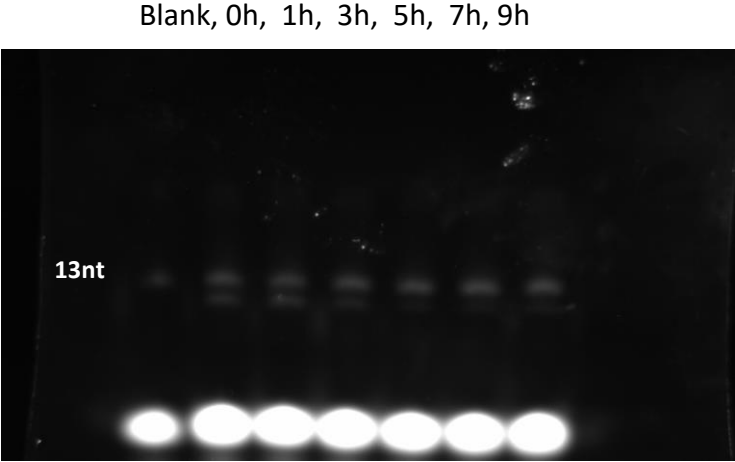

Recovery

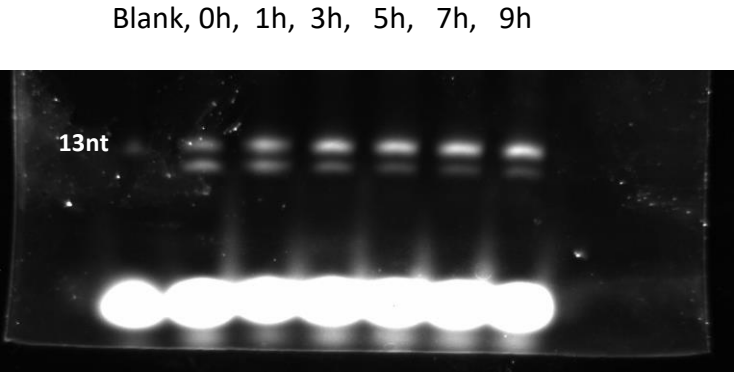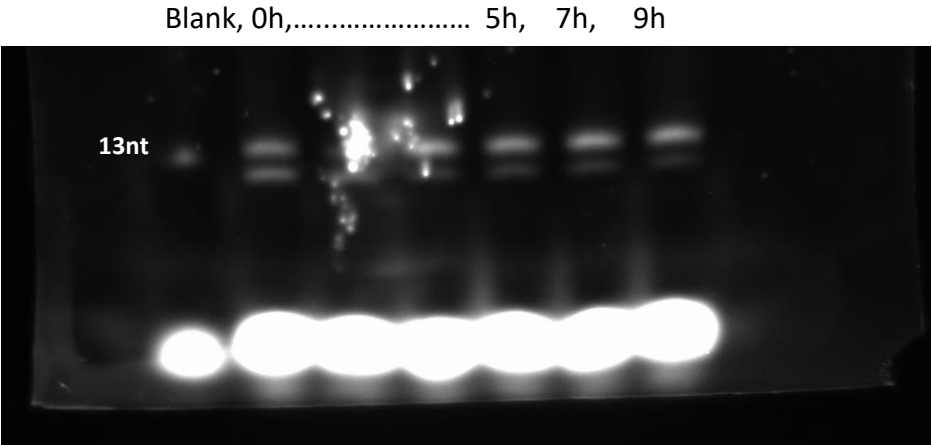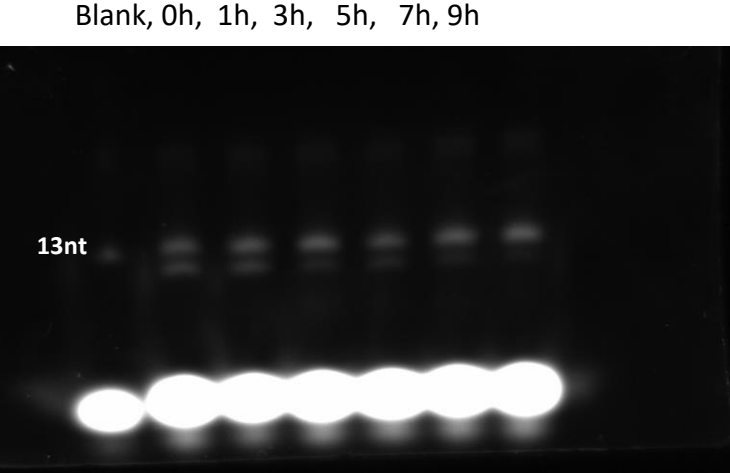

|    | no recovery |          |          |  | 10h recovery |          |          |
|----|-------------|----------|----------|--|--------------|----------|----------|
| 0h | 50.82744    | 45.55253 | 47.92951 |  | 47.91522     | 40.86479 | 44.7725  |
| 1h | 29.42339    |          | 49.6724  |  | 37.86118     |          | 39.07691 |
| 3h | 12.77287    |          | 31.44191 |  | 23.57195     |          | 30.10609 |
| 5h | 9.856818    | 15.83982 | 27.57348 |  | 20.83397     | 19.98389 | 35.02694 |
| 7h | 7.131401    | 13.06271 | 20.10335 |  | 14.56973     | 16.9328  | 28.20941 |
| 9h | 19.52427    | 12.47891 | 23.11802 |  | 16.39244     | 13.59163 | 22.31429 |

Sup Fig1D: TDP1 invitro

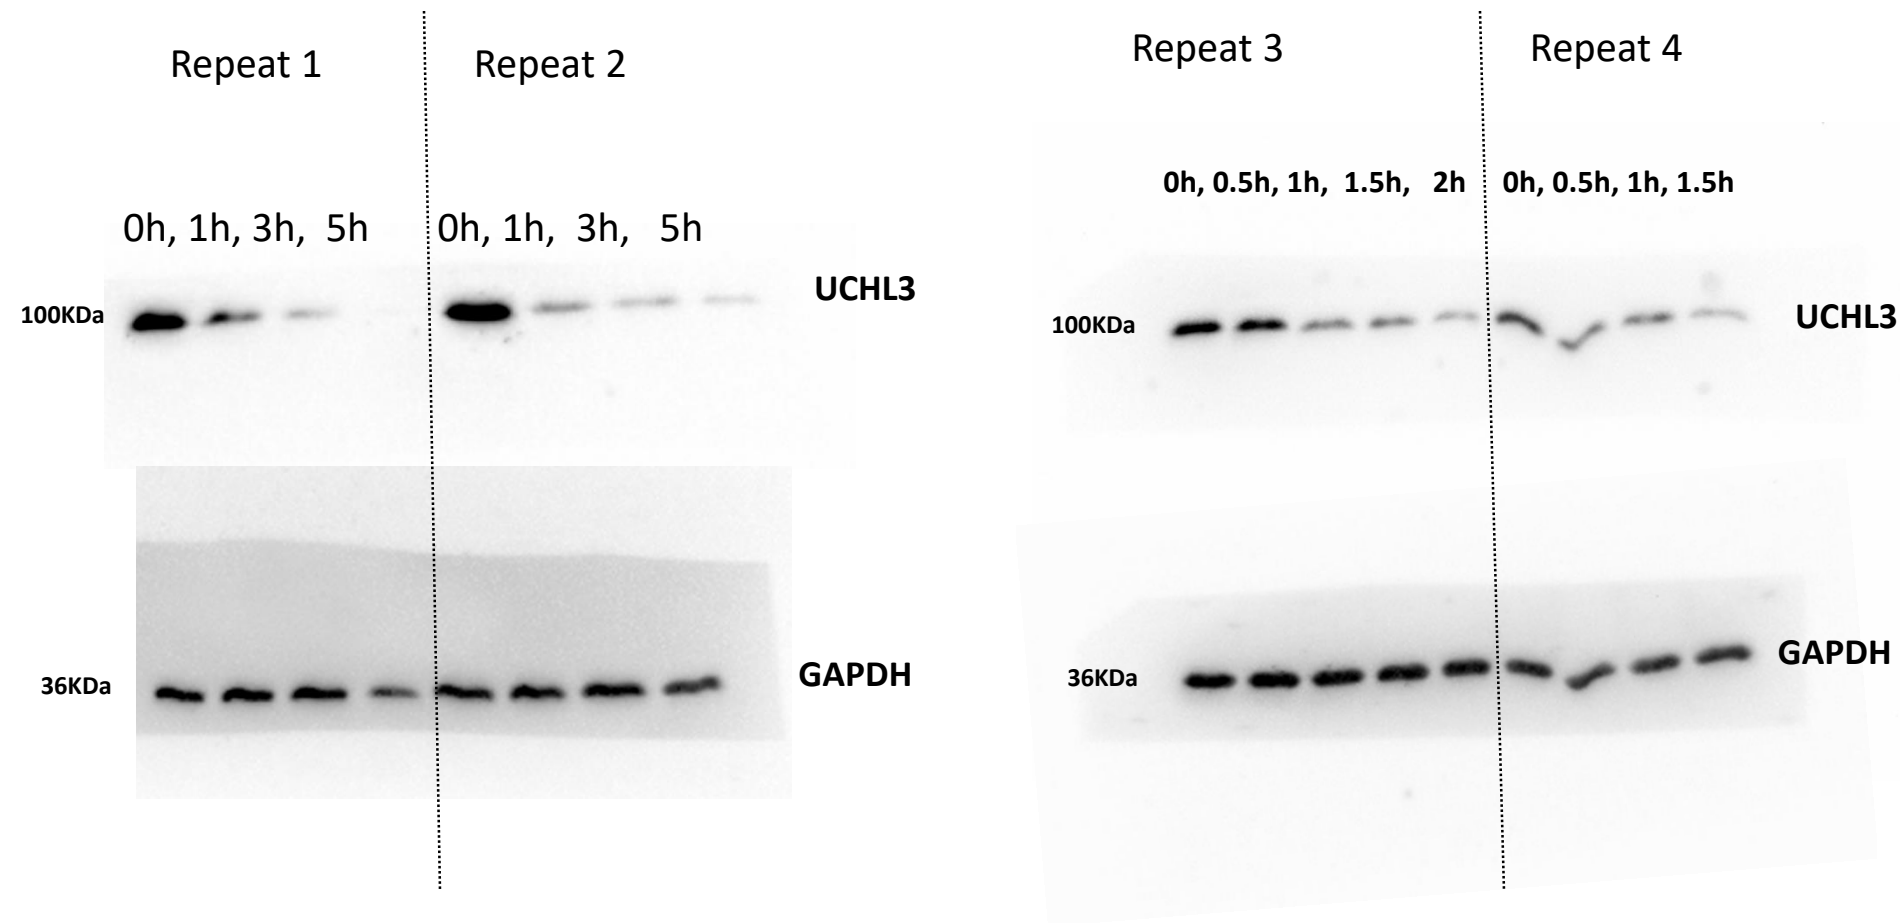

|         | 0h  | 0.5h     | 1h       | 1.5h     |
|---------|-----|----------|----------|----------|
| repeat1 | 100 |          | 29.92666 |          |
| repeat2 | 100 |          | 16.17816 |          |
| repeat3 | 100 | 77.60092 | 37.63786 | 33.27689 |
| repeat4 | 100 | 67.75622 | 67.20804 | 33.99389 |

Sup Fig1E: TDP1 invitro

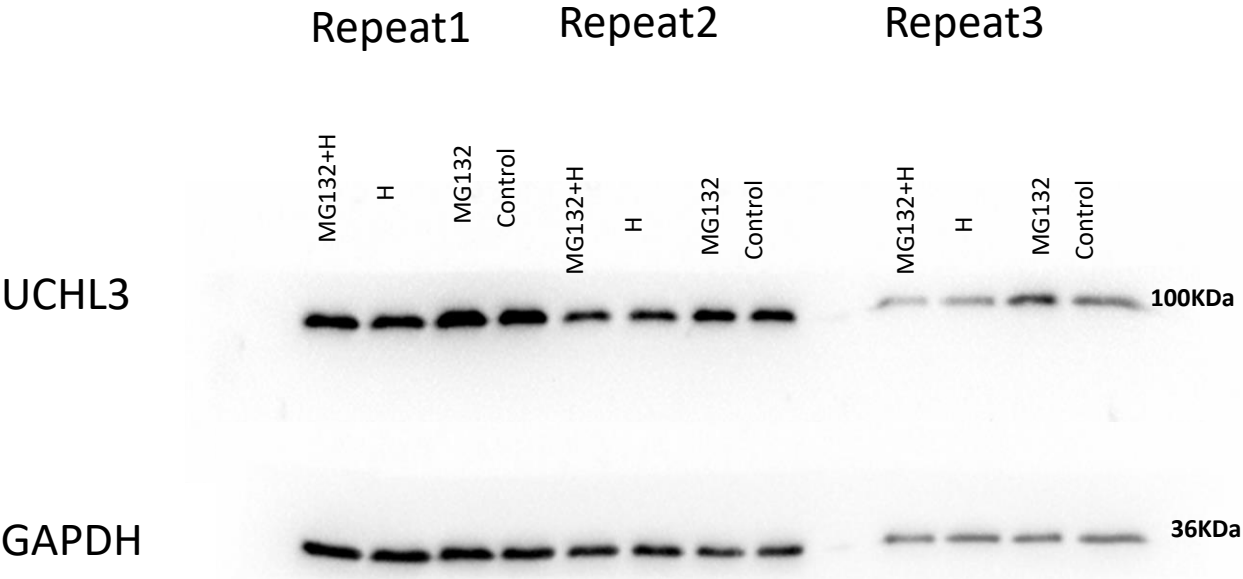

|         | Repeat1  | Repeat2  | Repeat3  |
|---------|----------|----------|----------|
| MG132+H | 82.57193 | 61.37013 | 42.90908 |
| H       | 77.9621  | 66.22433 | 52.87964 |
| MG132   | 106.2084 | 112.4492 | 129.7709 |
| Control | 100      | 100      | 100      |
