# Supplementary material for: High Temperature Drives Topoisomerase Mediated Chromosomal Break Repair Pathway Choice
Source: MDPI journal article supplement (doi:10.3390/cancers13102315), 2021-05-12
Supplement: s1 [file s1]

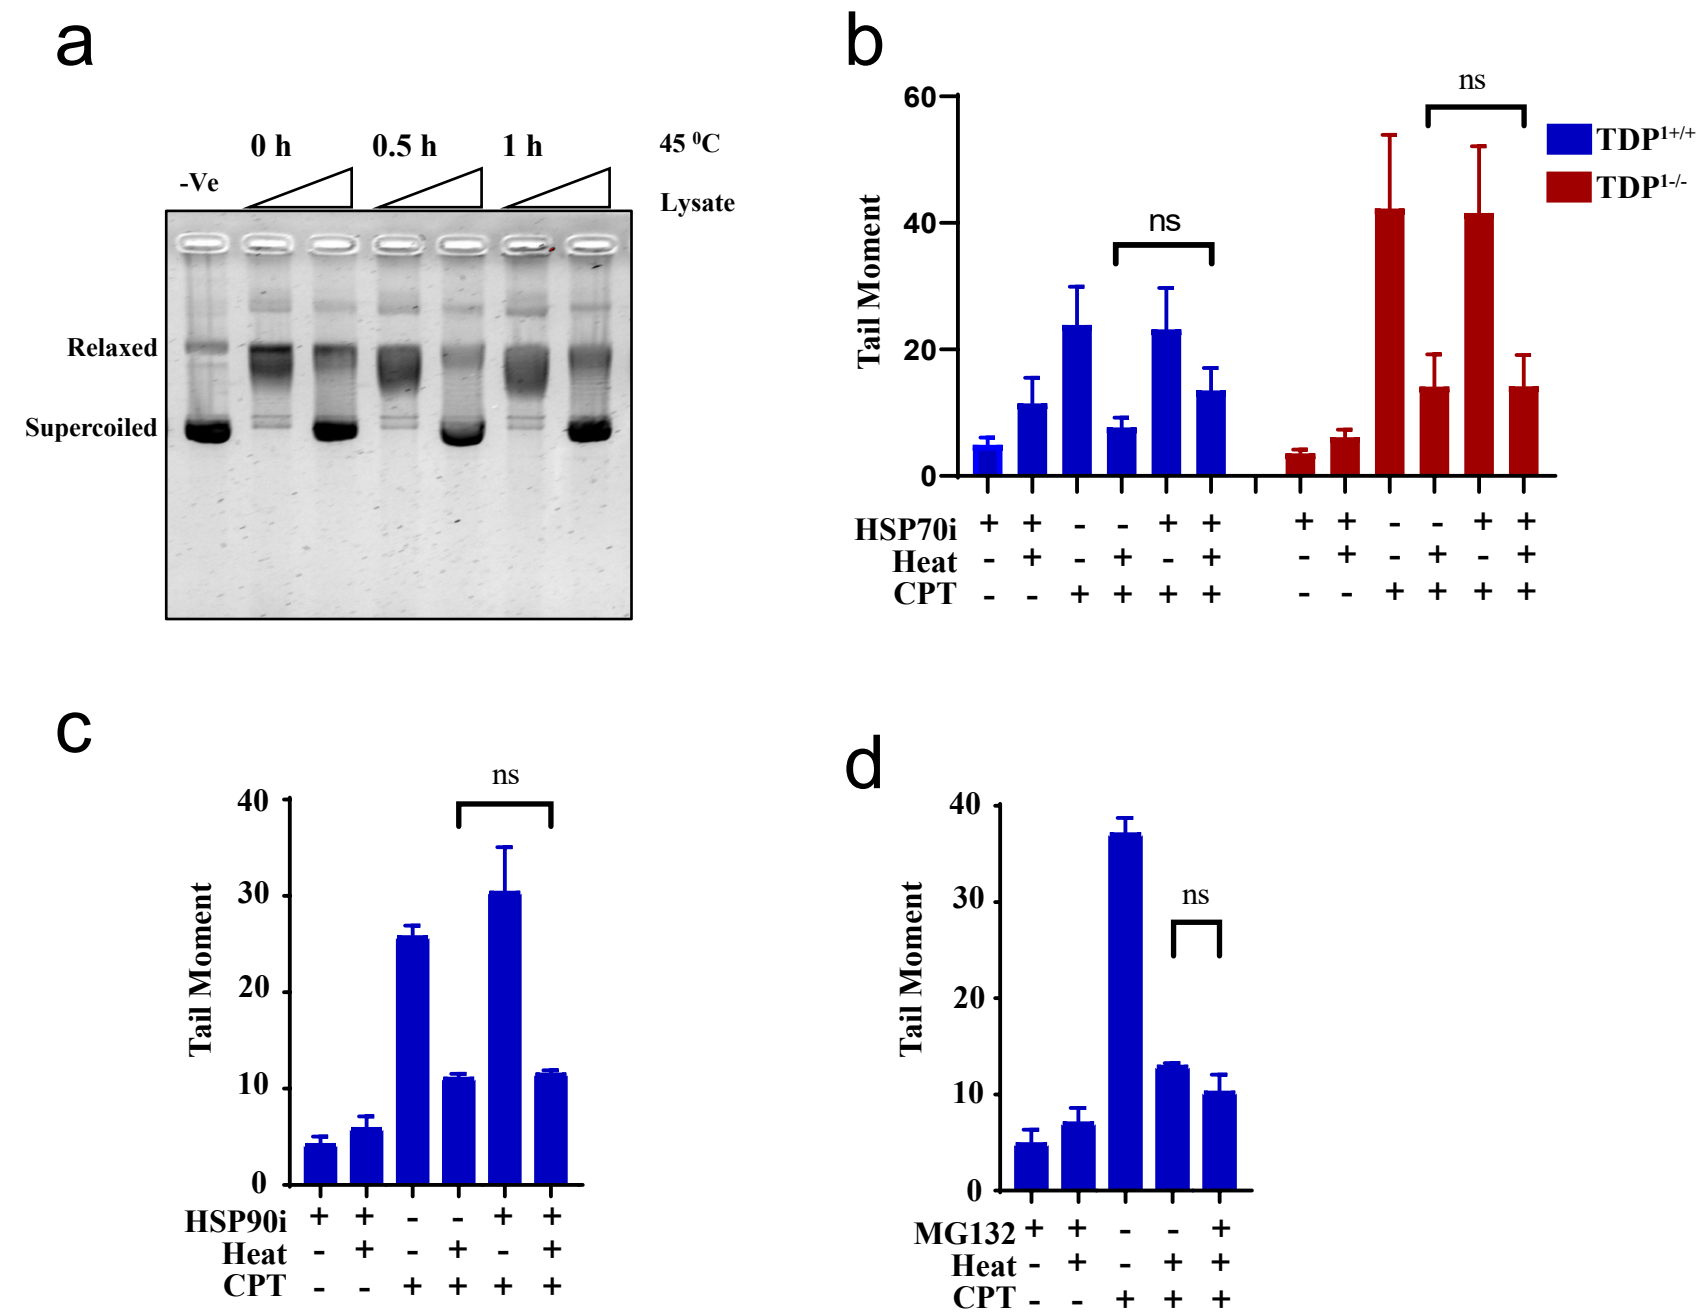

**Supplementary Fig 1: Hyperthermia reduces topoisomerase induced DNA damage independent of topoisomerase catalytic activity and heat shock proteins.**

a) RKO cells were incubated at 45°C for the indicated time, and then the cells were collected and lysed. Whole cell lysates were used as a source for topoisomerase I activity. Topoisomerase I activity was assayed by the relaxation of negatively supercoiled plasmid, pEGFPN1. b) G1 synchronized TK6 wild-type and TDP1 KO cells were incubated at 37°C or 43°C for 3h, then 100 μM CPT and/or 60 μM HSP70i (pifithrin-u) was added and DNA strand breaks quantified by alkaline comet assays. c) G1 synchronized TK6 cells were incubated at 37°C or 43°C for 3h, followed by 100 μM CPT, and/or 25 μM HSP90i (17-AAG) and strand breaks quantified by alkaline comet assays. d) TK6 cells were incubated at 37°C or 43°C for 3h, followed by 100 μM CPT and/or 10 μM MG132, and DNA strand breaks quantified by the alkaline comet assay. Data is a representative for three independent repeats.
